1 **Phospholipid flippases and Sfk1 are essential for the retention of ergosterol in the**  
2 **plasma membrane**

3

4 Takuma Kishimoto<sup>1\*</sup>, Tetsuo Mioka<sup>1</sup>, Eriko Itoh<sup>1</sup>, David E. Williams<sup>2</sup>, Raymond J.

5 Andersen<sup>2</sup>, Kazuma Tanaka<sup>1\*</sup>

6

7 <sup>1</sup> Division of Molecular Interaction, Institute for Genetic Medicine, Hokkaido University

8 Graduate School of Life Science, Sapporo, Hokkaido, Japan

9 <sup>2</sup>Departments of Chemistry and Earth, Ocean, and Atmospheric Sciences, University of

10 British Columbia, Vancouver, BC V6T 1Z1, Canada

11

12 \*Corresponding Author

13 E-mail: [kishitaku@igm.hokudai.ac.jp](mailto:kishitaku@igm.hokudai.ac.jp) (TK), [k-tanaka@igm.hokudai.ac.jp](mailto:k-tanaka@igm.hokudai.ac.jp) (KT)

14

15 Short title: Plasma membrane ergosterol retained by phospholipid flippases and Sfk1

16

17 **Abstract**

18 Sterols are important lipid components of the plasma membrane (PM) in eukaryotic cells, but  
19 it is unknown how the PM retains sterols at a high concentration. Phospholipids are  
20 asymmetrically distributed in the PM, and phospholipid flippases play an important role in  
21 generating this phospholipid asymmetry. Here, we provide evidence that phospholipid  
22 flippases are essential for retaining ergosterol in the PM of yeast. A mutant in three flippases,  
23 Dnf1-Lem3, Dnf2-Lem3, and Dnf3-Crf1, and a membrane protein, Sfk1, showed a severe  
24 growth defect. We recently identified Sfk1 as a PM protein involved in phospholipid  
25 asymmetry. The PM of this mutant showed high permeability and low density, and many  
26 nutrient transporters failed to localize to the PM. Staining with the sterol probe filipin and the  
27 expression of a sterol biosensor revealed that ergosterol was not retained in the PM. Instead,  
28 ergosterol accumulated in an esterified form in lipid droplets. We propose that ergosterol is  
29 retained in the PM by the asymmetrical distribution of phospholipids and the action of Sfk1.  
30 Once phospholipid asymmetry is severely disrupted, sterols might be exposed on the  
31 cytoplasmic leaflet of the PM and actively transported to the endoplasmic reticulum by sterol  
32 transfer proteins.

33

34 **Introduction**

35 Heterogeneity in the distribution of membrane phospholipids and sterols is essential for the

36 diverse functions of cells. In the plasma membrane (PM) of eukaryotic cells,  
37 phosphatidylcholine (PC), sphingolipids, and gangliosides are predominantly distributed in  
38 the extracellular leaflet, whereas phosphatidylethanolamine (PE), phosphatidylserine (PS),  
39 and other charged lipids are mainly localized to the cytoplasmic leaflet [1-3]. This  
40 asymmetric distribution of phospholipids is controlled by three types of lipid translocators:  
41 flippase, catalyzing inward phospholipid translocation (flip) [4-6]; floppase, catalyzing  
42 outwards phospholipid translocation (flop) [5, 7, 8]; and scramblase, catalyzing bidirectional  
43 phospholipid translocation [9].

44           Accumulating genetic and biochemical evidence indicates that flippases are  
45 integrally linked to phospholipid asymmetry of the organelle membrane from yeast to  
46 mammalian cells. Flippases, which are type 4 P-type ATPases (P4-ATPases), have the ability  
47 to translocate phospholipids from the extracellular leaflet of the PM or luminal leaflet of  
48 endomembranes to the cytoplasmic leaflet [6]. At the cellular level, flippases are associated  
49 with diverse physiological functions. Flippases in endomembranes function primarily in  
50 membrane trafficking processes [10-18], whereas those located in the PM are involved in  
51 multiple cellular processes: membrane trafficking [10, 12, 13, 19], apoptosis signaling [20],  
52 mating signaling [21], the apical membrane barrier [22], cell polarity [23-25], and cell  
53 migration [26].

54           Flippases form heterodimeric complexes with noncatalytic subunits of the Cdc50

55 family. Budding yeast has five P4-ATPases: Drs2, Dnf1, Dnf2, Dnf3, and Neo1 [27] and  
56 three Cdc50 family member proteins: Cdc50, Lem3, and Crf1 [13, 14]. Drs2 and Dnf3  
57 interact with Cdc50 and Crf1, respectively, and are mainly localized to the endomembrane,  
58 such as the *trans*-Golgi network (TGN) and endosomes. On the other hand, both Dnf1 and  
59 Dnf2 form complexes with Lem3 and are mainly localized to the PM [12, 28]. Except for  
60 Neo1, interactions between the P4-ATPases and Cdc50 subunits are essential for endoplasmic  
61 reticulum (ER) exit and proper subcellular localization of the complexes but may also  
62 contribute to their lipid translocase activity and functions [13, 14, 29-32]. Thus, phenotypes  
63 in P4-ATPase mutants are phenocopied by their subunit mutants [13, 14].

64 Dnf1/2-Lem3 complexes are endocytosed but recycled back to the PM through the  
65 endocytic recycling pathway [13, 14], maintaining the localization of these complexes to the  
66 PM. Genetic analyses suggested that the Dnf1/2-Lem3 complexes have PE and PS  
67 translocation activity [12, 28, 33, 34]. Considering the localization and activity of  
68 Dnf1/2-Lem3 complexes, they maintain phospholipid asymmetry predominantly at the PM.  
69 Compared to the other four P4-ATPases, little is known about the activity and function of the  
70 Dnf3-Crf1 complex. However, the deletion of *DNF3* increases the sensitivity of the *dnf1*Δ  
71 *dnf2*Δ double mutant to the PE-binding peptide duramycin [21], and Dnf3 is implicated in the  
72 translocation of PS across the PM [35], suggesting possible functions of the Dnf3-Crf1  
73 complex in PM phospholipid translocation.

74 In addition to Dnf1/2-Lem3, some regulators are involved in phospholipid asymmetry  
75 of the PM. Serine/threonine kinases Fpk1/2 upregulate Dnf1/2 flippase activity via  
76 phosphorylation [36]. Pdr5p and Yor1p, two multidrug ABC transporters [12, 37], and Opt2,  
77 a member of the oligopeptide transporter family [38], are implicated in the flop of  
78 phospholipids. Recently, we isolated Sfk1 as a multicopy suppressor of the *lem3* $\Delta$  mutant;  
79 overexpression of Sfk1 suppressed PE and PS exposure in the PM [39]. Sfk1 is a conserved  
80 transmembrane protein belonging to the TMEM150/FRAG1/DRAM family [40]. From  
81 genetic analyses, we proposed that Sfk1 might negatively regulate the transbilayer movement  
82 of phospholipids irrespective of direction in an unprecedented way. The *lem3* $\Delta$  *sfk1* $\Delta$  double  
83 mutant exhibits more severe defects in PE and PS asymmetry in the PM than the *lem3* $\Delta$   
84 mutant, and the *lem3* $\Delta$  *sfk1* $\Delta$  mutant exhibits increased permeability of the PM [39]. However,  
85 these mutations do not affect cell growth. Given that PM phospholipid asymmetry is  
86 commonly observed in eukaryotes, it may be speculated that phospholipid asymmetry plays  
87 an important role (e.g., is essential for cell growth). Thus, there might be a gene that  
88 functions redundantly with *LEM3* and *SFK1* to control phospholipid asymmetry.

89 Another important feature of the PM is that this membrane is rich in sterols. Sterols  
90 such as mammalian cholesterol and the fungal ergosterol are essential membrane components  
91 with tightly controlled homeostasis [41]. At the cellular level, the PM contains approximately  
92 30-40 mol% cholesterol in PM lipids, whereas ER contains approximately 5 mol%

93 cholesterol [42, 43]. Sterols are inserted into lipid membranes through the interaction  
94 between 3-hydroxyl groups and hydrocarbon rings of sterols and polar head groups and  
95 hydrocarbon chains of phospholipids, respectively [44]. Each phospholipid has a different  
96 affinity for sterols, which determines the strength of their interaction with sterols [45, 46].  
97 Sphingolipids, PC, and PS interact strongly with sterol, whereas phospholipids with small  
98 polar head groups and unsaturated fatty acyl tails exhibit weaker interactions [47-49].  
99 Numerous studies have suggested that these interactions contribute to the properties of the  
100 PM, including tight packing, high rigidity, and low permeability. However, it is unclear how  
101 the PM retains such a high concentration of sterols and whether the asymmetric distribution  
102 of PE and PS is involved in retaining sterols in the PM.

103         In this study, we searched for genes that functionally interact with *LEM3* and *SFK1* by  
104 synthetic lethal genetic screening and identified *dnf3* and *crf1* as interacting partners. The  
105 conditional *crf1 lem3 sfk1* triple mutant cannot maintain ergosterol in the PM and instead  
106 accumulates esterified ergosterol in the lipid droplet (LD). Our results suggest that  
107 Dnf1/2-Lem3 and Dnf3-Crf1 flippases and Sfk1 function cooperatively to maintain the  
108 phospholipid asymmetry of the PM, which is essential for sterol retention in the PM and thus  
109 for the homeostatic control of sterol.

110

111 **Results**

112 **Dnf3-Crf1 flippase is involved in PM phospholipid asymmetry together with**

113 **Dnf1/2-Lem3 flippases and Sfk1**

114 To isolate genes involved in the regulation of phospholipid asymmetry of the PM in  
115 conjunction with Lem3 and Sfk1, we searched for mutations that display synthetic lethality  
116 with *lem3Δ sfk1Δ* mutations at 30°C. We isolated a new allele of the flippase noncatalytic  
117 subunit *crf1* (Fig 1A). To confirm this synthetic lethality, we crossed the *crf1Δ lem3Δ* mutant  
118 to the *lem3Δ sfk1Δ* mutant, followed by tetrad analysis (Fig 1B). The *crf1Δ lem3Δ sfk1Δ*  
119 triple mutant did not germinate at 30°C but germinated at 25°C despite severe growth defects  
120 (Fig 1B), which allowed us to obtain the *crf1Δ lem3Δ sfk1Δ* triple mutant for further analysis.  
121 We next tested the growth of the *crf1Δ lem3Δ sfk1Δ* triple mutant at 30 and 37°C. The triple  
122 mutant grew very slowly at 30°C and showed lethality at 37°C (Fig 1C). The deletion of  
123 *DNF3*, which encodes the catalytic subunit of Crf1 [13], also grew poorly when combined  
124 with *lem3Δ sfk1Δ* (Fig 1D).

125 Dnf3 is mainly localized to endosomal/Golgi membranes [10, 12], but it was  
126 suggested that Dnf3 also functions at the PM [35]. To examine whether Dnf3-Crf1 is  
127 transported to the PM, we used the endocytosis-deficient *vrp1Δ* mutant [50]. Both  
128 Dnf3-3xGFP (triple tandem green fluorescent protein [GFP]) and Crf1-GFP were localized to  
129 intracellular structures but were barely detectable in the PM of the wild-type. However, they  
130 were observed in the PM when endocytosis was inhibited (Fig 1E). This result indicates that

131 the Dnf3-Crf1 flippase is transported between the PM and endomembranes, similar to  
132 Drs2-Cdc50 [14]. These results raise the possibility that the synthetic growth defect of the  
133 *crf1Δ lem3Δ sfk1Δ* mutant is caused by defects in the PM, and this point was analyzed  
134 further.

135

136 **Fig 1. Synthetic growth defects of the *crf1Δ lem3Δ sfk1Δ* mutant.**

137 (A) Growth profiles on 5-fluoroorotic acid (5-FOA) plate medium. The *crf1Δ lem3Δ sfk1Δ*  
138 mutant harboring pRS316-*SFK1* was transformed with YCplac111 (pCon), YCplac111-*LEM3*  
139 (p*LEM3*), YCplac111-*CRF1* (p*CRF1*), or pRS315-*SFK1* (p*SFK1*). Transformants were  
140 streaked onto an SD-Leu + 5-FOA plate and grown at 30°C for 3 d. The cells that require  
141 pRS316-*SFK1* for growth are sensitive to 5-FOA because pRS316 contains the *URA3* gene  
142 [51]. (B) Tetrad dissection analysis. Diploid cells with the indicated genotype were sporulated,  
143 dissected, and grown at either 30 or 25°C for 4 d. Colonies were replica-plated onto selective  
144 media to determine the segregation of the marked mutant alleles. Tetrad genotypes (TT,  
145 tetratype; PD, parental ditype; and NPD, nonparental ditype) are indicated, and the identities  
146 of the triple mutant segregants are shown in parentheses (red circles). (C) Growth profiles by  
147 spot growth assay. As described in the “Materials and Methods”, tenfold serial dilutions of  
148 cell cultures were spotted onto YPDA and grown for 1.5 d at 30 or 37°C. (D) Synthetic  
149 growth defects of the *dnf3Δ lem3Δ sfk1Δ* mutant. Tetrad analysis was performed as in (B).



150 (E) Localizations of Dnf3-3xGFP (triple tandem GFP) and Crf1-GFP in the endocytosis  
151 defective *vrp1*Δ mutant. Cells were grown to mid-log phase in YPDA medium at 30°C.  
152 Arrows indicate the cells showing the PM localization of examined proteins. Bar, 5 μm. DIC,  
153 differential interference contrast.

154

155 We attempted to perform phenotypic analysis of the *crf1*Δ *lem3*Δ *sfk1*Δ triple mutant.  
156 However, the expression of some GFP-fused proteins resulted in lethality in the *crf1*Δ *lem3*Δ  
157 *sfk1*Δ background. Thus, we constructed temperature-sensitive (ts) mutants of *SFK1* by  
158 random mutagenesis in the *lem3*Δ *crf1*Δ background as described in the “Materials and  
159 Methods”. The *crf1*Δ *lem3*Δ *sfk1-2* mutant exhibited acceptable growth at 30°C but a severe  
160 growth defect at 37°C (Fig 2A). From the growth profiles of the *crf1*Δ *lem3*Δ *sfk1-2* mutant  
161 at 30 and 37°C (S1 Fig), we determined that phenotypes of the triple mutant were analyzed  
162 after culturing for 6 h after the shift to 37°C. DNA sequencing of the *sfk1-2* mutant allele  
163 revealed that *sfk1-2* contained one mutation that resulted in an amino acid substitution W16R  
164 (Fig 2B), which was located in the N-terminal transmembrane region. Wild-type Sfk1-3xGFP  
165 was localized to the PM, whereas the mutant Sfk1-2-3xGFP exhibited a lower signal in the  
166 PM and the ER at 30°C and was barely detectable at 37°C (Fig 2C).

167 Phospholipid asymmetry defects cause the exposure of PS and PE to the extracellular  
168 leaflet of the PM. The exposed PS and PE can be indirectly measured by examination of the

169 growth sensitivities of the mutants to the PS-binding cyclodepsipeptide papuamide B (PapB)  
170 and PE-binding tetracyclic peptide duramycin. We previously reported that the *lem3Δ sfk1Δ*  
171 double mutant exhibited high sensitivities to both peptides [39]. Thus, we first tested the  
172 growth sensitivity of the *crf1Δ lem3Δ sfk1-2* triple mutant to these peptides at 30°C (Fig 2D).  
173 The addition of either the *crf1Δ* or *dnf3Δ* mutation to the *lem3Δ* mutant elevated the  
174 sensitivities to both peptides (S2A Fig), consistent with a previous report on the *dnf1Δ dnf2Δ*  
175 *dnf3Δ* mutant [21]. The *crf1Δ lem3Δ sfk1-2* mutant did not grow at the concentrations at  
176 which the *crf1Δ lem3Δ* and *lem3Δ sfk1-2* double mutants could grow (Fig 2D), suggesting  
177 that the *crf1Δ lem3Δ sfk1-2* triple mutant exposed more PS and PE even at the permissive  
178 temperature than did the double mutants. To further confirm the defect in phospholipid  
179 asymmetry in the triple mutant, we next visualized the PE exposed to the extracellular surface  
180 using the PE-binding biotinylated Ro 09-0198 peptide (Bio-Ro). Fluorescence signals were  
181 not detected in either the wild-type or *crf1Δ sfk1Δ* double mutant but were detected in both  
182 the *crf1Δ lem3Δ* (45%) and *lem3Δ sfk1Δ* double mutants (58%) (Fig 2E, left and middle  
183 panels). In the *crf1Δ lem3Δ sfk1Δ* triple mutant, the proportion of cells with fluorescent  
184 signals increased to 85%. Furthermore, the average signal intensity in the triple mutant was  
185 1.35-fold higher than that in the *lem3Δ sfk1Δ* mutant (Fig 2E, right panel).

186         Next, we examined PS distribution in the cytoplasmic leaflet of the PM in the *crf1Δ*  
187 *lem3Δ sfk1-2* triple mutant. To visualize PS, we expressed PS biosensors, the C2 domain of

188 lactadherin (Lact-C2) [52] and the pleckstrin homology (PH) domain of evectin-2 (evt-2PH)  
189 [53]. GFP-Lact-C2 was mainly distributed in the PM of the examined cells, but intracellular  
190 localization was also observed in the triple mutant (Fig 2F, left panel, S2B Fig). In contrast,  
191 GFP-evt-2PH was normally distributed only to the PM in the wild-type and double mutants  
192 (more than 96% of cells with PM distribution), whereas the GFP-evt-2PH signal was lost or  
193 significantly reduced from the PM in the *crf1*Δ *lem3*Δ *sfk1-2* triple mutant (59% of cells with  
194 PM distribution) (Fig 2F, middle and right panels, S2C Fig). We speculate that Lact-C2 has a  
195 higher affinity for PS, resulting in the detection of a lower level of PS at the PM. Taken  
196 together, these results suggest that the asymmetric distribution of PE and PS was most  
197 disturbed in the *crf1*Δ *lem3*Δ *sfk1* triple mutants.

198         As the Dnf3-Crf1 complex was mainly localized to endosomal/TGN compartments  
199 (Fig 1E) [10, 12], the *crf1*Δ *lem3*Δ *sfk1-2* mutant may exhibit a defect in membrane  
200 trafficking. We examined the localization of the endocytic recycling marker GFP-Snc1,  
201 which is mainly localized to polarized PM sites [54], but its localization was not affected in  
202 the *crf1*Δ *lem3*Δ *sfk1-2* triple mutant at 37°C (Fig 2G). Similarly, two PM proteins, Pdr5-GFP  
203 (ABC transporter) [55] and Pma1 (H<sup>+</sup>-ATPase) [56], were normally transported to the PM in  
204 the *crf1*Δ *lem3*Δ *sfk1-2* triple mutant (Fig 2G). We also examined endocytosis in the *crf1*Δ  
205 *lem3*Δ *sfk1-2* triple mutant by uptake of the lipophilic dye FM4-64 [57]. The FM4-64 signal  
206 was well colocalized to the vacuole membrane marker Vph1-3xGFP [58] in both the

207 wild-type and *crf1Δ lem3Δ sfk1-2* triple mutant after 30 min of incubation, suggesting that the  
208 triple mutant did not have obvious defects in endocytosis (Fig 2H). These results suggest that  
209 the *crf1Δ lem3Δ sfk1-2* triple mutant is not defective in membrane trafficking to or from the  
210 PM.

211

212 **Fig 2. The *crf1Δ lem3Δ sfk1* triple mutants show severe defects in phospholipid**  
213 **asymmetry but not in membrane trafficking.**

214 (A) Isolation of the *sfk1-2* ts mutant. Tenfold serial dilutions of cell cultures were spotted  
215 onto a YPDA plate, followed by incubation at 30 or 37°C for 1.5 d. (B) Amino acid  
216 substitution of the Sfk1-2 mutant protein. The W16R substitution occurs in the first  
217 transmembrane domain of Sfk1-2. (C) Localization of the Sfk1-2 mutant protein fused with  
218 3xGFP. Cells were grown in YPDA medium to mid-log phase at 30°C and then shifted to  
219 37°C, followed by incubation for 6 h. (D) The *crf1Δ lem3Δ sfk1-2* triple mutant was sensitive  
220 to PapB and duramycin. Tenfold serial dilutions were spotted onto a YPDA plate containing  
221 PapB or duramycin, followed by incubation at 30°C for 2 d. (E) PE was most exposed in the  
222 *crf1Δ lem3Δ sfk1Δ* mutant. *Left panels:* cells were cultured in YPDA at 30°C, and exposed  
223 PE was visualized by staining with Bio-Ro and Alexa Fluor 488–labeled streptavidin. Dashed  
224 lines indicate cell edges. *Middle panel:* the percentages of cells showing PE exposure were  
225 determined and are expressed as the mean ± standard deviation (S.D.) of three independent

226 experiments ( $n > 81$  cells in total for each strain). An asterisk indicates a significant  
227 difference, as determined by the Tukey–Kramer test ( $p < 0.05$ ). *Right panel*: fluorescence  
228 intensity at the PM was quantitated as described in the “Materials and Methods”. The ratio of  
229 the fluorescence at the PM ( $F_{\text{pm}}$ )/that of whole cell ( $F_{\text{whole cell}}$ ) was determined and expressed  
230 in a boxplot (whiskers: maximum and minimum values; box: first quartile, median, and third  
231 quartile; circle: average). The numbers of cells analyzed were 23, 38, and 35 for the wild-type,  
232 *lem3Δ sfk1Δ*, and *crf1Δ lem3Δ sfk1Δ*, respectively. An asterisk indicates a significant  
233 difference, as determined by the Tukey–Kramer test ( $p < 0.05$ ). (F) GFP-evt-2PH was  
234 mislocalized in the *crf1Δ lem3Δ sfk1-2* mutant. Cells were cultured as in Fig 2C. *Right panel*:  
235 the percentage of cells with GFP-evt-2PH at the PM was determined and is expressed as the  
236 mean  $\pm$  S.D. of three independent experiments ( $n > 154$  cells in total for each strain). An  
237 asterisk indicates a significant difference, as determined by the Tukey–Kramer test ( $p < 0.05$ ).  
238 (G) Normal localization of PM proteins in the *crf1Δ lem3Δ sfk1-2* mutant. Cells were  
239 cultured as in Fig 2C. Pma1 was detected by immunostaining as described in the “Materials  
240 and Methods”. (H) Endocytosis was not significantly affected in the *crf1Δ lem3Δ sfk1-2*  
241 mutant. Cells expressing the vacuole membrane marker Vph1-3xGFP were cultured as in Fig  
242 2C. Then, cells were incubated with FM4-64 on ice for 30 min, followed by incubation at  
243 37°C for 30 min. Arrows indicate the colocalization of FM4-64 and Vph1-3xGFP. Bars, 5  
244  $\mu\text{m}$ .

245

246

247 **Multiple functions of the PM are impaired in the *crf1*Δ *lem3*Δ *sfk1* triple mutants**

248 Phospholipid asymmetry defects may have a profound effect on PM functions. Previously,

249 we showed that the *lem3*Δ *sfk1*Δ double mutant exhibits an increase in membrane

250 permeability by measuring rhodamine dye uptake [39]. This experiment was performed in the

251 *crf1*Δ *lem3*Δ *sfk1*Δ triple mutant, and the results suggest that the permeability is further

252 enhanced in the triple mutant compared with that in the *lem3*Δ *sfk1*Δ double mutant (Fig 3A).

253 The large increase in membrane permeability prompted us to examine whether the lipid

254 composition changes in the PM of the *crf1*Δ *lem3*Δ *sfk1*-2 triple mutant. We performed

255 sucrose density gradient fractionation to isolate the PM. In wild-type, PM markers, both

256 Pdr5-GFP [55] and Pma1 [59, 60], were recovered in high-density fractions, whereas Kex2,

257 which is localized to endosomal/TGN compartments [54, 61], peaked at a lower density (Fig

258 3B). However, in the *crf1*Δ *lem3*Δ *sfk1*-2 triple mutant, Pdr5-GFP, Pma1, and Kex2 were

259 recovered together in lower density fractions (fractions 4-8) (Fig 3B). Pdr5-GFP and Pma1

260 were normally localized to the PM in the *crf1*Δ *lem3*Δ *sfk1*-2 triple mutant in microscopic

261 analysis (Fig 2G), suggesting a decrease in PM density, which makes PM isolation from the

262 triple mutant technically challenging. Thus, we measured the phospholipid composition in the

263 total cellular lipids. No significant difference in lipid composition was found in the double

264 and triple mutants (S3 Fig).

265           The PM integrity defects may impact critical functions of the PM, such as  
266 localization of PM transporters involved in nutrient uptake. We analyzed the localization of  
267 PM transporters in the *crf1* $\Delta$  *lem3* $\Delta$  *sfk1-2* mutant. In the wild-type and double mutants,  
268 incubation at 37°C had little effect on the PM localization of amino acid transporters  
269 Can1-GFP and Hip1-GFP [56, 62]; more than 94% of the cells displayed PM localization  
270 (Fig 3C and 3D, S4A Fig). However, both transporters were not localized to the PM and  
271 instead were only localized to the vacuole in many of the *crf1* $\Delta$  *lem3* $\Delta$  *sfk1-2* mutant cells;  
272 the percentage of Can1-GFP and Hip1-GFP at the PM decreased to 58% and 41%,  
273 respectively (Fig 3C and 3D). Other amino acid transporters (Alp1, Lyp1, Tat1, and Ptr2)  
274 and hexose transporters (Hxt2-4) [62-65] also failed to localize to the PM in the *crf1* $\Delta$  *lem3* $\Delta$   
275 *sfk1-2* mutant (S4B Fig). To test whether these transporters once reached the PM before  
276 being transported to the vacuole, we next examined Can1-GFP and Hip1-GFP localizations  
277 in cells treated with Latrunculin-A (LAT-A), which inhibits actin-dependent endocytic  
278 internalization by interfering with actin patch assembly [66]. In the triple mutant, LAT-A  
279 treatment increased the number of cells showing PM localization of Can1-GFP (67%) and  
280 Hip1-GFP (63%) compared with the control DMSO treatment (Can1-GFP, 32%; Hip1-GFP,  
281 38%) (S4C Fig). We conclude that the *crf1* $\Delta$  *lem3* $\Delta$  *sfk1* triple mutants cannot maintain PM  
282 integrity, causing multiple defects in PM function.

283

284 **Fig 3. Multiple defects in the PM of the *crf1*Δ *lem3*Δ *sfk1* triple mutants.**

285 (A) Rhodamine uptake is increased in the *crf1*Δ *lem3*Δ *sfk1*Δ triple mutant. Cells were  
286 cultured in YPDA medium at 30°C, preincubated in SD medium with 1 mM sodium azide for  
287 30 min at 30°C, and incubated with rhodamine 6G for 60 min at 30°C. Rhodamine  
288 accumulation was measured as described in the “Materials and Methods”. Values represent  
289 the mean ± S.D. from three independent experiments. Asterisks indicate a significant  
290 difference, as determined by the Tukey–Kramer test ( $p < 0.05$ ). (B) Sucrose density gradient  
291 centrifugation analysis of PM proteins, Pdr5-GFP and Pma1, and a TGN/endosome protein,  
292 Kex2, in the *crf1*Δ *lem3*Δ *sfk1*-2 triple mutant. Cells were cultured as in Fig 2C. Cell lysates  
293 were prepared from the wild-type and the *crf1*Δ *lem3*Δ *sfk1*-2 triple mutant expressing  
294 Pdr5-GFP and fractionated in 27–60% sucrose step density gradients as described in the  
295 “Materials and Methods”. Equivalent volumes from each fraction were subjected to sodium  
296 dodecyl sulfate polyacrylamide gel electrophoresis (SDS-PAGE), and proteins were detected  
297 by immunoblotting. (C and D) The distributions of GFP-fused amino acid transporters,  
298 Can1-GFP (C) and Hip1-GFP (D), were analyzed in the wild-type and the *crf1*Δ *lem3*Δ *sfk1*-2  
299 triple mutant. Cells were cultured as in Fig 2C. Bar, 5 μm. *Right panels*: the percentage of  
300 cells with Can1-GFP or Hip1-GFP at the PM was determined and is expressed as the mean ±  
301 S.D. of three independent experiments ( $n > 170$  cells in total for each strain). An asterisk



302 indicates a significant difference, as determined by the Tukey–Kramer test ( $p < 0.05$ ).

303

### 304 **Isolation of *KES1* as a multicopy suppressor of the *crf1* $\Delta$ *lem3* $\Delta$ *sfk1-2* mutation**

305 To explore the essential functions of phospholipid asymmetry in the PM, we screened for

306 multicopy suppressors of the ts growth defect of the *crf1* $\Delta$  *lem3* $\Delta$  *sfk1-2* triple mutant. We

307 found that overexpression of *KES1* suppressed the growth defect (Fig 4A). Kes1, also known

308 as Osh4, is an oxysterol-binding protein (OSBP) homolog (Osh) that is implicated in sterol

309 transport within cells [67]. Budding yeast contains seven Osh homologs, Osh1-7, that

310 exchange specific lipids between organelles [68]. We next tested whether overexpression of

311 other Osh proteins, except for *OSH1*, which localizes to the nucleus-vacuole junction [69],

312 could suppress the growth defect of the *crf1* $\Delta$  *lem3* $\Delta$  *sfk1-2* triple mutant. Only *KES1*

313 overexpression suppressed the ts growth defect of the *crf1* $\Delta$  *lem3* $\Delta$  *sfk1-2* triple mutant (Fig

314 4A). Increased rhodamine uptake and Can1-GFP mislocalization were also suppressed by

315 *KES1* overexpression in the *crf1* $\Delta$  *lem3* $\Delta$  *sfk1-2* triple mutant (Fig 4B and 4C).

316 Kes1 interacts with phosphatidylinositol (PI) -4-phosphate (PI(4)P), and this

317 interaction is implicated in sterol transport [67]. However, Sfk1 was implicated in the

318 function of a PI 4 kinase, Stt4 [70, 71]. We thus examined the distribution of PI(4)P by using

319 the PI(4)P-specific biosensor Osh2-PH in the *crf1* $\Delta$  *lem3* $\Delta$  *sfk1-2* triple mutant. However, the

320 localization of Osh2-PH-GFP was not significantly affected (S5A Fig). The mammalian

321 homolog of Sfk1, TMEM150A, interacts with PI 4 kinase type III $\alpha$  via its C-terminal domain  
322 [40, 71]. However, the C-terminally truncated *SFK1 $\Delta$ C-GFP* did not show synthetic growth  
323 defects with *crf1 $\Delta$  lem3 $\Delta$*  mutations (S5B Fig). These results suggest that the defects in the  
324 *crf1 $\Delta$  lem3 $\Delta$  sfk1* triple mutants may not be closely related to PI(4)P.

325 We next examined whether the sterol-binding activity of Kes1 is required to suppress  
326 the growth defect of the *crf1 $\Delta$  lem3 $\Delta$  sfk1-2* triple mutant. Overexpression of *KESI<sup>E117A</sup>*,  
327 *KESI<sup>L111D</sup>*, and *KESI<sup>Y97F</sup>*, which abolishes the binding of Kes1 to sterols [72], did not  
328 suppress the growth defect of the triple mutant (Fig 4D). Correspondingly, overexpression of  
329 *KESI<sup>L111D</sup>* did not suppress rhodamine accumulation (Fig 4B, p*Kes1m*). These results suggest  
330 that the *crf1 $\Delta$  lem3 $\Delta$  sfk1-2* triple mutant may have a defect in intracellular sterol transport.

331 We next examined the subcellular localization of Kes1 in the *crf1 $\Delta$  lem3 $\Delta$  sfk1-2*  
332 triple mutant (Fig 4E). Wild-type and double mutants displayed the diffuse distribution of  
333 Kes1-GFP in the cytosol with a few puncta (Fig 4E, S6A Fig). In contrast, the *crf1 $\Delta$  lem3 $\Delta$*   
334 *sfk1-2* triple mutant showed Kes1-GFP localization in abnormal membranous structures (Fig  
335 4E). Because they appeared to be localized around the nucleus, we examined the localization  
336 of the ER marker GFP-ER (GFPenvy-Scs2<sup>220-244</sup>) [73]. Abnormal ER structures close to the  
337 perinuclear ER were observed specifically in the triple mutant at a frequency similar to that  
338 of the abnormal Kes1-GFP structures (56%, n=210 cells) (Fig 4F, S6B Fig). Coexpression of  
339 *KESI-GFP* and the ER marker *SEC63-mRFPI* (monomeric red fluorescent protein 1

340 [*mRFP1*]) demonstrated that Kes1-GFP colocalized with Sec63-mRFP1 in the abnormal  
341 structures but not in the perinuclear ER in the *crf1*Δ *lem3*Δ *sfk1-2* triple mutant (Fig 4G). This  
342 colocalization was observed in 90% of the *crf1*Δ *lem3*Δ *sfk1-2* triple mutant displaying  
343 abnormal Kes1-GFP structures (n=450 cells). Taken together, these results suggest that the  
344 *crf1*Δ *lem3*Δ *sfk1-2* triple mutant may have a defect in ergosterol homeostasis.

345

346 **Fig 4. Overexpression of *KES1* partially suppresses the phenotypes in the *crf1*Δ *lem3*Δ**  
347 ***sfk1-2* triple mutant.**

348 (A) Suppression of the growth defect. Cell growth was examined in the *crf1*Δ *lem3*Δ *sfk1-2*  
349 triple mutant carrying pRS316-*SFK1*, YEplac195, or YEplac195-*OSH2-7*. YEplac195 is a  
350 multicopy plasmid. After cells were cultured in SDA-U medium at 30°C overnight, tenfold  
351 serial dilutions were spotted onto a YPDA plate, followed by incubation for 2 d at 30 or 37°C.

352 (B) Suppression of high membrane permeability. Rhodamine uptake was examined in the  
353 wild-type and *crf1*Δ *lem3*Δ *sfk1-2* triple mutant harboring YEplac195 (pCon),  
354 YEplac195-*KES1* (p*Kes1*), or YEplac195- *KES1*<sup>L111D</sup> (p*Kes1m*). Cells were cultured as in Fig  
355 2C, except that SDA-Ura medium was used. The rhodamine uptake assay was performed as  
356 described in the “Materials and Methods”. Rhodamine uptake is represented as a relative  
357 value of that (100%) in the wild-type harboring YEplac195 incubated at 30°C. Values  
358 represent the mean ± S.D. from three independent experiments. Asterisks indicate a

359 significant difference, as determined by the Tukey–Kramer test ( $p < 0.05$ ). (C) Suppression of  
360 the mislocalization of Can1-GFP. *CAN1-GFP*-expressing cells harboring  
361 YEplac195-*KES1-KanMX6* or YEplac195-*KanMX6* are shown. Cells were cultured as in Fig  
362 2C, except that YPDA medium containing G418 was used. Bar, 5  $\mu\text{m}$ . *Right panel*: the  
363 percentage of cells with Can1-GFP at the PM was determined and is expressed as the mean  $\pm$   
364 S.D. of three independent experiments ( $n > 263$  cells in total for each strain). An asterisk  
365 indicates a significant difference, as determined by the Tukey–Kramer test ( $p < 0.05$ ). (D)  
366 Overexpression of ergosterol-binding deficient *KES1* mutants does not suppress ts growth of  
367 the *crf1* $\Delta$ *lem3* $\Delta$ *sfk1-2* triple mutant. Cell growth was examined in the triple mutant  
368 transformed with pRS316-*SFK1*, YEplac195, YEplac195-*KES1*, or YEplac195-*KES1* mutants  
369 (E117A, L111D, and Y97F). Cells were spotted and grown as in (A). (E) Kes1-GFP is  
370 localized to abnormal structures in the *crf1* $\Delta$ *lem3* $\Delta$ *sfk1-2* triple mutant. *Left panel*: cells  
371 were cultured as in Fig 2C. Bar, 5  $\mu\text{m}$ . *Middle panel*: enlarged images of dotted red squares in  
372 the left panel. Bar, 2  $\mu\text{m}$ . *Right panel*: the percentage of cells harboring abnormal structures  
373 of Kes1-GFP was determined and is expressed as the mean  $\pm$  S.D. of three independent  
374 experiments ( $n > 210$  cells in total for each strain). An asterisk indicates a significant  
375 difference, as determined by the Tukey–Kramer test ( $p < 0.05$ ). (F) Abnormal ER structures  
376 in the *crf1* $\Delta$ *lem3* $\Delta$ *sfk1-2* triple mutant. The ER was visualized by the expression of  
377 GFPenvy-Scs2<sup>220–244</sup> (GFP-ER). Cells were cultured as in Fig 2C. An arrow indicates

378 abnormal ER structures. Bar, 5  $\mu$ m. (G) Colocalization of Kes1-GFP with Sec63-mRFP1 in  
379 the *crf1* $\Delta$  *lem3* $\Delta$  *sfk1-2* triple mutant. Cells were cultured as in Fig 2C. The abnormal ER  
380 structures in squares 1 and 2 are enlarged in the lower panel. Arrows represent Kes1-GFP  
381 puncta colocalized with Sec63-mRFP1. Bars, 2  $\mu$ m (upper panel) and 0.4  $\mu$ m (lower panel).  
382

### 383 **Ergosterol is reduced in the PM of the *crf1* $\Delta$ *lem3* $\Delta$ *sfk1* triple mutants**

384 We examined the distribution of ergosterol in the *crf1* $\Delta$  *lem3* $\Delta$  *sfk1* triple mutants. Filipin is a  
385 polyene antibiotic that binds to cholesterol and ergosterol and is used as a probe for cellular  
386 sterol distribution [74, 75]. Wild-type and double mutants were evenly labeled with filipin at  
387 the PM (Fig 5A, S7 Fig). However, the *crf1* $\Delta$  *lem3* $\Delta$  *sfk1* $\Delta$  triple mutant drastically decreased  
388 filipin labeling to the PM and instead showed the enhancement of intracellular labeling (Fig  
389 5A). This labeling pattern was similar to that of Kes1-GFP, but costaining experiments could  
390 not be performed because the fixation step for filipin staining diminished the GFP  
391 fluorescence. Eighty-three percent of the *crf1* $\Delta$  *lem3* $\Delta$  *sfk1* $\Delta$  triple mutant cells clearly  
392 displayed the loss or reduction of filipin signal in the PM (n=98 cells). Quantitative analysis  
393 of fluorescence images further confirmed the decrease in filipin intensity on the PM in the  
394 triple mutant (Fig 5A).

395 We also examined another sterol biosensor, D4H. A bacterial protein toxin,  
396 perfringolysin O, binds to cholesterol via its domain 4 (D4) [76, 77]. A D4 derivative, D4H

397 (D4<sup>D434S</sup>), has been developed as a more sensitive probe; it binds to liposomes containing  
398 20-30% cholesterol mole concentration [48, 77]. Although D4H has recently been used to  
399 detect the PM sterol in fission yeast [78], D4H has not been applied to budding yeast. We  
400 generated two fluorescent protein-conjugated D4Hs, GFP-D4H and GFPenvy-D4H, in which  
401 GFPenvy is a photostable dimeric GFP derivative [79, 80]. When expressed in wild-type cells,  
402 GFP-D4H was localized to the PM in 35% of the cells (Fig 5B). In contrast, GFPenvy-D4H  
403 was localized to the PM in 94% of the cells. Interestingly, GFPenvy-D4H showed a  
404 characteristic localization pattern; it preferentially localized to daughter cells compared to  
405 mother cells. This localization pattern is described in the last part of “Results” in more detail.

406 We next examined the binding activity of recombinant GFP-D4H and GFPenvy-D4H  
407 to ergosterol *in vitro* by liposome sedimentation assay using  
408 1,2-Dioleoyl-sn-glycero-3-phosphocholine (DOPC) liposomes containing either 50%  
409 cholesterol or 50% ergosterol. Consistent with a previous report [81], GFP-D4H bound to  
410 ergosterol liposomes at an efficiency of 20% of that to cholesterol liposomes (Fig 5C). On the  
411 other hand, GFPenvy-D4H bound to ergosterol liposomes at an efficiency of 56% of that to  
412 cholesterol liposomes (Fig 5C), consistent with the results in living cells. The affinity of  
413 GFPenvy-D4H to ergosterol was examined with DOPC liposomes containing different  
414 concentrations of ergosterol from 10 to 60 mol %. Binding was detected when the ergosterol  
415 concentration was 25% or higher (Fig 5D). These results are comparable to the affinity of

416 D4H to cholesterol [48]. The higher affinity of GFPenvy-D4H to ergosterol than GFP-D4H  
417 might be because GFPenvy forms a dimeric structure [80].

418 We next confirmed that GFPenvy-D4H binds to ergosterol in living cells. The *ERG11*  
419 gene encodes lanosterol demethylase, which is essential for ergosterol synthesis [82]. Both  
420 the shut-off of *ERG11* gene expression and treatment with the Erg11 inhibitor fluconazole  
421 inhibited GFPenvy-D4H distribution to the PM (Fig 5E, S8A Fig). We also examined the  
422 localization of GFPenvy-D4H in mutants of genes involved in the late steps of the ergosterol  
423 biosynthesis pathway (*ERG2-6*) [83, 84]. GFPenvy-D4H was not localized to the PM except  
424 for *erg4* $\Delta$ , which catalyzes the last step (S8B Fig). These results suggest that GFPenvy-D4H  
425 is localized to the PM by binding to ergosterol.

426 We examined the distribution of GFPenvy-D4H in the *crf1* $\Delta$  *lem3* $\Delta$  *sfk1-2* triple  
427 mutant. The localization of GFPenvy-D4H to the PM decreased to some extent in the *lem3* $\Delta$   
428 *sfk1-2* and *crf1* $\Delta$  *lem3* $\Delta$  double mutants, but it drastically decreased to 16% in the *crf1* $\Delta$   
429 *lem3* $\Delta$  *sfk1-2* triple mutant (Fig 5F, S8C Fig). Together with the results of filipin staining, we  
430 concluded that ergosterol is significantly lost from the PM in the *crf1* $\Delta$  *lem3* $\Delta$  *sfk1* triple  
431 mutants. Kes1 overexpression increased the PM localization of GFPenvy-D4H from 25% to  
432 55% in the *crf1* $\Delta$  *lem3* $\Delta$  *sfk1-2* triple mutant (S8D Fig). These results suggest that the  
433 increased Kes1 enhances ergosterol transport to or inhibits loss of ergosterol from the PM in  
434 the triple mutant and that loss of ergosterol from the PM causes phenotypes of the triple

435 mutant, including the growth defect.

436

437 **Fig 5. Ergosterol is decreased in the PM of the *crf1*Δ *lem3*Δ *sfk1* triple mutants.**

438 (A) Staining of ergosterol with filipin in the *crf1*Δ *lem3*Δ *sfk1*Δ triple mutant. Cells were  
439 grown in YPDA at 30°C, and filipin staining was performed as described in the “Materials  
440 and Methods”. *Right panel*: fluorescence intensity at the PM was quantitated as described in  
441 the “Materials and Methods”. The ratio of the fluorescence at the PM ( $F_{\text{pm}}$ )/that of whole cell  
442 ( $F_{\text{whole cell}}$ ) was determined and expressed with a boxplot (whiskers: maximum and minimum  
443 values; box: first quartile, median, and third quartile; circle: average). The numbers of cells  
444 analyzed were 100, 100, 99, 97, and 98 for the wild-type, *lem3*Δ *sfk1*Δ, *crf1*Δ *sfk1*Δ, *crf1*Δ  
445 *lem3*Δ, and *crf1*Δ *lem3*Δ *sfk1*Δ, respectively. An asterisk indicates a significant difference, as  
446 determined by the Tukey–Kramer test ( $p < 0.05$ ). (B) The distribution of GFP- and  
447 GFPenvy-D4H in wild-type cells. Cells harboring pRS316-GFP-D4H or -GFPenvy-D4H  
448 were grown in SDA-Ura medium at 30°C to the mid-log phase. *Right panel*: the percentage  
449 of cells with GFP- or GFPenvy-D4H at the PM was determined and is expressed as the mean  
450  $\pm$  S.D. of three independent experiments ( $n > 155$  cells in total for each strain). An asterisk  
451 indicates a significant difference, as determined by the Tukey–Kramer test ( $p < 0.05$ ). (C)  
452 GFPenvy-D4H binds to ergosterol *in vitro*. The liposome sedimentation assay was performed  
453 as described in the “Materials and Methods”. Proteins were incubated with liposomes



454 composed of DOPC or DOPC and 50% (mol) ergosterol (Ergo) or cholesterol (Chol) (with  
455 corresponding reduction in DOPC), followed by pelleting by centrifugation. Supernatant  
456 (Sup) and pellet (Ppt) fractions were separated by SDS-PAGE, followed by staining with  
457 Coomassie Brilliant Blue. Arrowheads indicate GFP-D4H or GFPenvy-D4H. A lower band  
458 appears to be an incomplete fragment. *Right panel:* proteins bound to liposomes were  
459 quantitated by an image analyzer. The percentage of the bound protein was determined as a  
460 relative value of that bound to cholesterol liposomes and is expressed as the mean  $\pm$  S.D. of  
461 three independent experiments. Asterisks indicate a significant difference, as determined by  
462 the Tukey–Kramer test ( $p < 0.05$ ). (D) GFPenvy-D4H binds to DOPC liposomes containing  
463 more than 25% ergosterol. A liposome sedimentation assay was performed as in (C) with  
464 DOPC liposomes containing the indicated mol % ergosterol. An arrowhead indicates  
465 GFPenvy-D4H. A lower band appears to be an incomplete fragment. The amount of protein  
466 bound to liposomes is expressed as a relative value (percentage) of that bound to 60%  
467 ergosterol liposomes. Values represent the mean  $\pm$  S.D. of three independent experiments. "S"  
468 and "P" indicate supernatant and pellet fractions, respectively. Asterisks and "n.s" indicate  
469 significant and no significant differences as determined by the Tukey–Kramer test (\* $p < 0.05$ ),  
470 respectively. (E) The PM localization of GFPenvy-D4H was dependent on ergosterol. *ERG11*  
471 was expressed under the control of the glucose-repressible  $P_{GALI}$  promoter. Cells were grown  
472 in SGA-Ura medium to the mid-log phase at 30°C and then inoculated into fresh galactose

473 (SGA-Ura) or glucose (SDA-Ura) medium, followed by incubation for 12 h at 30°C. *Right*  
474 *panel*: the percentage of cells with GFPenvy-D4H at the PM was determined and is expressed  
475 as the mean  $\pm$  S.D. of three independent experiments ( $n > 108$  cells in total for each  
476 condition). An asterisk indicates a significant difference, as determined by the Tukey–Kramer  
477 test ( $p < 0.05$ ). (F) GFPenvy-D4H was not localized to the PM in the *crf1* $\Delta$  *lem3* $\Delta$  *sfk1-2*  
478 triple mutant. Cells were cultured as in Fig 2C, except that SDA-Ura medium was used. *Right*  
479 *panel*: the percentage of cells with GFPenvy-D4H at the PM was determined and is expressed  
480 as the mean  $\pm$  S.D. of three independent experiments ( $n > 253$  cells in total for each strain).  
481 An asterisk indicates a significant difference, as determined by the Tukey–Kramer test ( $p <$   
482  $0.05$ ). Bars, 5  $\mu$ m.

483

484 We next examined whether exogenously added ergosterol would suppress the growth defect  
485 in the *crf1* $\Delta$  *lem3* $\Delta$  *sfk1-2* triple mutant. We used strains carrying the gain-of-function  
486 mutation of a transcription factor *UPC2*, *upc2-1* (G888D), which results in increased uptake  
487 of exogenous ergosterol under aerobic conditions [85, 86]. The exogenously added ergosterol,  
488 which was sufficient to suppress the growth defect of the ergosterol-deficient *hem1* $\Delta$  mutant  
489 [87], did not suppress the growth defect of the *crf1* $\Delta$  *lem3* $\Delta$  *sfk1-2* triple mutant even when  
490 *KES1* was overexpressed (Fig 6A). We presumed that the triple mutant cannot retain  
491 exogenously added ergosterol in the PM. Thus, we monitored the distribution of exogenously

492 added TopFluor-cholesterol (TF-Chol), a fluorescent dye-conjugated cholesterol analog [88].  
493 TF-Chol was retained in the PM of the wild-type and double mutants containing *upc2-1* but  
494 was not in the *crf1Δ lem3Δ sfk1-2 upc2-1* mutant; only 23% of the triple mutant showed  
495 TF-Chol in the PM (Fig 6B, S9 Fig). TF-Chol appeared to be internalized into the cell to be  
496 incorporated into cytoplasmic punctate structures in the *crf1Δ lem3Δ sfk1-2 upc2-1* mutant  
497 (Fig 6B). These results suggest that ergosterol is not retained in the PM and that it is  
498 transported to intracellular punctate structures in the *crf1Δ lem3Δ sfk1-2* mutant.

499

500 **Fig 6. Exogenously added ergosterol appears to not be retained in the PM of the *crf1Δ***  
501 ***lem3Δ sfk1-2 upc2-1* mutant.**

502 (A) Exogenous ergosterol did not suppress its growth in the *crf1Δ lem3Δ sfk1-2 upc2-1*  
503 mutant. The *crf1Δ lem3Δ sfk1-2* mutant with or without the *upc2-1* mutation was transformed  
504 with pRS315-*SFK1*, YEplac181, or YEplac181-*KES1*. After cells were cultured in  
505 SD-Ura-Leu medium at 30°C overnight, tenfold serial dilutions were spotted onto a YPDA  
506 plate containing 0.5% Tween-80 and 0.5% ethanol with or without 50 µg/mL ergosterol,  
507 followed by incubation for 1.5 d at 30 or 37°C. (B) TF-Chol is not retained in the PM of the  
508 *crf1Δ lem3Δ sfk1-2 upc2-1* mutant. *Left panel*: cells were cultured and labeled with TF-Chol  
509 as described in the “Materials and Methods”. Bar, 5 µm. *Right panel*: the percentage of cells  
510 with TF-Chol at the PM was determined and is expressed as the mean ± S.D. of three

511 independent experiments (n > 290 cells in total for each strain). An asterisk indicates a  
512 significant difference, as determined by the Tukey–Kramer test (p < 0.05).

513

514 **Ergosterol is esterified and accumulated in LDs in the *crf1*Δ *lem3*Δ *sfk1-2* mutant**

515 The loss of ergosterol in the PM raises a question: where does ergosterol distribute in the  
516 cell? We performed thin-layer chromatography (TLC) analysis of total sterols extracted from  
517 the cells. In double mutants, the free ergosterol level was approximately 80-85% of that in the  
518 wild-type, but it decreased to 50% in the *crf1*Δ *lem3*Δ *sfk1*Δ triple mutant (Fig 7A). TLC  
519 analysis also showed a large increase in esterified ergosterol in the *crf1*Δ *lem3*Δ *sfk1*Δ triple  
520 mutant. We confirmed that this spot was observed in the wild-type at the stationary phase, but  
521 not in the acyl-CoA:sterol acyltransferase deficient *are1*Δ *are2*Δ mutant (S10 Fig) [89].

522 Because esterified ergosterol is the main component of LDs, these results suggest that LDs  
523 are increased in the *crf1*Δ *lem3*Δ *sfk1*Δ triple mutant. To confirm this, we stained LDs with  
524 the lipophilic dye Nile red, which stains neutral lipids in LDs, triacylglycerol and esterified  
525 ergosterol [90]. Neither the wild-type nor the double mutants showed obvious staining of  
526 Nile red, whereas the *crf1*Δ *lem3*Δ *sfk1*Δ triple mutant exhibited a clear increase in cells  
527 showing Nile red puncta (Fig 7B, S11A Fig). We further examined the localization of  
528 GFP-tagged LD-related proteins, Tgl1 (steryl ester lipase) [91] and Faa4 (long-chain  
529 fatty-acid-CoA ligase) [92]. The wild-type and the double mutants contained a few puncta of

530 these proteins, whereas the numbers of Tgl1-GFP and Faa4-GFP puncta increased 2.5- and  
531 2.8-folds, respectively, in the *crf1*Δ *lem3*Δ *sfk1-2* triple mutant compared to those in the  
532 wild-type (Fig 7C, S11B Fig). We confirmed that Tgl1-GFP and Faa4-GFP puncta were  
533 colocalized with Nile red-positive puncta; 85% of Tgl1-GFP (n=377) and 88% of Faa4-GFP  
534 (n=453) puncta were colocalized with Nile red in the *crf1*Δ *lem3*Δ *sfk1-2* triple mutant (Fig  
535 7C). These results suggest that a substantial amount of ergosterol was esterified and  
536 accumulated in LDs in the *crf1*Δ *lem3*Δ *sfk1* triple mutants.

537 TF-Chol was also detected in intracellular puncta in the *crf1*Δ *lem3*Δ *sfk1-2 upc2-1*  
538 mutant (Fig 6B). We next examined whether TF-Chol colocalizes with Faa4-mCherry in the  
539 triple mutant. The *crf1*Δ *lem3*Δ *sfk1-2 upc2-1* mutant contained approximately 9~14 TF-Chol  
540 puncta per cell, and 88% of these puncta (n=603) were colocalized with Faa4-mCherry (Fig  
541 7D).

542 Taken together, these results suggest that ergosterol is not retained in the PM and is  
543 transported to LDs in an esterified form, probably via the ER, in the *crf1*Δ *lem3*Δ *sfk1* triple  
544 mutants.

545

546 **Fig 7. LDs were increased in the *crf1*Δ *lem3*Δ *sfk1* triple mutants.**

547 (A) TLC analysis of total sterols. Ergosterol contents were analyzed by TLC as described in  
548 the “Materials and Methods”. *Right panel*: the percentage of free ergosterol relative to that of

549 the wild-type was determined and is expressed as the mean  $\pm$  S.D. derived from the analysis  
550 of six independent samples. An asterisk indicates a significant difference, as determined by  
551 the Tukey–Kramer test ( $p < 0.05$ ). (B) Increase in Nile red-positive puncta in the *crf1* $\Delta$  *lem3* $\Delta$   
552 *sfk1* $\Delta$  triple mutant. Cells were cultured in YPDA medium to the mid-log phase at 30°C,  
553 followed by Nile red staining. Nile red staining was performed as described in the “Materials  
554 and Methods”. *Right panel*: the percentage of cells with more than three Nile Red puncta was  
555 determined and is expressed as the mean  $\pm$  S.D. of three independent experiments ( $n > 315$   
556 cells in total for each strain). An asterisk indicates a significant difference, as determined by  
557 the Tukey–Kramer test ( $p < 0.05$ ). (C) Increase in LD marker (Tgl1-GFP and  
558 Faa4-GFP)-containing structures in the *crf1* $\Delta$  *lem3* $\Delta$  *sfk1-2* triple mutant. Cells were cultured  
559 as in Fig 2C, followed by Nile red staining. *Right panel*: the numbers of Tgl1-GFP or  
560 Faa4-GFP puncta were counted in a single focal plane of each cell and expressed with  
561 boxplots (whiskers: maximum and minimum values; box: first quartile, median, and third  
562 quartile; circle: average). The number of cells analyzed was 51 and 50 (wild-type) and 53 and  
563 51 (triple mutant) for Tgl1-GFP and Faa4-GFP, respectively. Asterisks indicate a significant  
564 difference, as determined by the Tukey–Kramer test ( $p < 0.05$ ). (D) Colocalization of  
565 TF-Chol puncta with Faa4-mCherry in the *crf1* $\Delta$  *lem3* $\Delta$  *sfk1-2* *upc2-1* mutant. Cells were  
566 cultured as in Fig 2C, except that YPDA medium containing TF-Chol was used. Bars, 5  $\mu$ m.  
567

568 **The inhibition of sterol esterification partially suppresses growth defects and sterol**

569 **retention in the PM of the *crf1*Δ *lem3*Δ *sfk1-2* mutant**

570 We examined whether inhibition of sterol esterification by mutations in *ARE1/ARE2*  
571 suppresses the phenotypes of the *crf1*Δ *lem3*Δ *sfk1-2* triple mutant. The growth defect of the  
572 triple mutant was partially suppressed by the *are2*Δ mutation but not by the *are1*Δ mutation  
573 (Fig 8A). Consistently, Are2 accounts for 65–75% of total cellular acyl-CoA:sterol  
574 acyltransferase activity [93, 94]. The growth defect of the triple mutant was not suppressed  
575 by either the *dga1*Δ or *lro1*Δ mutation, which abolishes the synthesis of triacylglycerol  
576 [95-97], the other major lipid in LDs (S12A Fig). We then examined whether the *are2*Δ  
577 mutation restored sterol retention in the PM in the *crf1*Δ *lem3*Δ *sfk1-2* triple mutant. The  
578 *are2*Δ mutation increased the number of cells showing the PM localization of GFPenvy-D4H  
579 from 17% to 60% in the *crf1*Δ *lem3*Δ *sfk1-2* mutant (Fig 8B). A TF-Chol uptake experiment  
580 could not be performed because the *are2*Δ *upc2-1* double mutant showed a severe growth  
581 defect (S12B Fig). These results are consistent with our notion that loss of ergosterol from the  
582 PM is responsible for the growth defect of the *crf1*Δ *lem3*Δ *sfk1-2* triple mutant.

583

584 **Fig 8. The *are2*Δ mutation partially restores ergosterol in the PM of the *crf1*Δ *lem3*Δ**  
585 ***sfk1-2* triple mutant.**

586 (A) Suppression of the growth defect. Tenfold serial dilutions were spotted onto a YPDA

587 plate, followed by incubation for 1.5 d at 30 or 37°C. (B) Restoration of GFPenvy-D4H  
588 localization to the PM. Cells were cultured as in Fig 2C except that SDA-Ura medium was  
589 used. Bar, 5  $\mu$ m. *Right panel*: the percentage of cells with GFPenvy-D4H at the PM was  
590 determined and is expressed as the mean  $\pm$  S.D. of three independent experiments (n > 219  
591 cells in total for each strain). Asterisks and "n.s" indicate significant and no significant  
592 differences as determined by the Tukey–Kramer test (\*p < 0.05), respectively.

593

#### 594 **Overexpression of Sfk1 alters the localization of GFPenvy-D4H**

595 The molecular function of Sfk1 remains to be clarified, but our results described above may  
596 suggest that Sfk1 is functionally related to ergosterol in the PM. We examined whether a  
597 mutation or overexpression of *SFK1* affects the localization of GFPenvy-D4H.

598 GFPenvy-D4H exhibited polarized localizations in many wild-type cells; it was localized to  
599 daughter cells (buds) or near the bud neck in medium- or large-budded cells (Fig 9A, yellow  
600 and pink arrows). These results suggest that the accessibility to ergosterol is different  
601 between bud and mother PMs because filipin, which was used in fixed cells, evenly stained  
602 ergosterol in daughter and mother cells. Interestingly, Sfk1 was mainly localized to mother  
603 cells but not to daughter cells, as described previously [71], showing a localization pattern  
604 opposite that of GFPenvy-D4H (Fig 9B and 9C). The GFPenvy-D4H localizations in  
605 large-budded cells were categorized into three patterns: (1) localized throughout the PM (not



606 polarized), (2) localized to the bud and mother cell PM near the bud neck (partially polarized),  
607 and (3) localized only to the bud (polarized). These differences may be because  
608 GFPenvy-D4H was expressed from a centromeric plasmid. The fluorescence intensity  
609 profiles of Sfk1-3xmCherry and GFPenvy-D4H are shown for the “polarized” (Fig 9C) and  
610 “partially polarized” (S13A Fig) patterns. The proportion of these localization patterns was  
611 not changed in the *sfk1*Δ mutant (Fig 9A and 9D).

612           We then examined the effect of *SFK1* overexpression by using a multicopy plasmid  
613 carrying *SFK1-mCherry*. Expression from a multicopy plasmid generates heterogeneity in the  
614 level of gene expression among individual cells because of variation in plasmid copy number  
615 [98]. We took advantage of this expression characteristic to examine the correlation between  
616 the Sfk1 expression level and the D4H localization pattern. Cells were categorized into high  
617 and low expression groups based on the fluorescent intensity of Sfk1-mCherry. The relative  
618 expression level of *SFK1-mCherry* in highly expressing cells was more than 3-fold that in  
619 lowly expressing cells (S13B Fig). In cells lowly expressing Sfk1-mCherry, the  
620 GFPenvy-D4H localization pattern was not changed (Fig 9E, cyan arrows, and 9F). The  
621 mother cell-specific localization pattern of Sfk1-mCherry was not changed in highly  
622 expressing cells (Fig 9E, yellow arrows). Interestingly, in cells highly expressing  
623 Sfk1-mCherry, GFPenvy-D4H distribution was restricted exclusively to the daughter cells,  
624 and those cells that showed the “polarized” pattern were largely increased to 74% (Fig 9F). In

625 these cells, the fluorescence intensity of GFPenvy-D4H was weak in the mother cell PM but  
626 increased sharply near the bud neck (Fig 9G). These results suggest that Sfk1 might maintain  
627 ergosterol in a state that is inaccessible to GFPenvy-D4H, although its function may be  
628 redundant with that of an unknown protein.

629

630 **Fig 9. Overexpression of Sfk1 excludes GFPenvy-D4H from the mother cell PM.**

631 (A) The polarized distribution of GFPenvy-D4H. Wild-type or *sfk1*Δ cells carrying  
632 pRS316-GFPenvy-D4H were grown in SD-Ura medium to the mid-log phase at 30°C.  
633 “Polarized”, “partially polarized”, and “not polarized” localizations of GFPenvy-D4H are  
634 indicated with pink, yellow, and green arrows, respectively. (B) Complementary localization  
635 of GFPenvy-D4H and Sfk1-3xmCherry to daughter (bud) and mother cells, respectively.  
636 Wild-type cells expressing these proteins were grown at 30°C. To show endogenously  
637 expressed Sfk1-3xmCherry clearly, the brightness was adjusted to make it brighter. (C)  
638 Fluorescence intensity profile of a cell showing the “polarized” pattern of GFPenvy-D4H.  
639 Fluorescence signals were quantified along the dotted line from the mother cell to the bud.  
640 The brightness of Sfk1-3xmCherry was adjusted as in (B). (D) Quantification of three  
641 GFPenvy-D4H localization patterns. The cells in (A) were examined. The percentage of cells  
642 showing “polarized”, “partially polarized”, and “not polarized” localizations of  
643 GFPenvy-D4H was determined as described in the “Materials and Methods” and is expressed

644 as the mean  $\pm$  S.D. of three independent experiments ( $n > 150$  cells in total for each strain).

645 “n.s.,” indicates no significant difference between all combinations as determined by the

646 Tukey–Kramer test. (E) Heterogeneous (high and low) expression of Sfk1-mCherry by a

647 multicopy plasmid. Wild-type cells carrying pRS316-GFPenvy-D4H and

648 YEplac181-*SFK1-mCherry* were grown in SD-Leu-Ura medium to the mid-log phase at 30°C.

649 The brightness was not adjusted after background subtraction. Arrows indicate cells highly

650 (yellow) and lowly (cyan) expressing Sfk1-mCherry. (F) High expression of Sfk1-mCherry

651 significantly increased the “polarized” pattern of GFPenvy-D4H. Cells were examined and

652 categorized as in (D). Low or high expression of Sfk1-mCherry was determined as described

653 in the legend of S13B Fig. *Bars*: No, control plasmid; Endo, endogenous expression of

654 Sfk1-3xmCherry; Low, multicopy plasmid of *SFK1-mCherry* but low expression of

655 Sfk1-mCherry; High, multicopy plasmid of *SFK1-mCherry* and high expression of

656 Sfk1-mCherry. The percentage of cells showing indicated patterns is expressed as the mean  $\pm$

657 S.D. of three independent experiments ( $n > 103$  cells in total for each strain). An asterisk

658 indicates a significant difference, as determined by the Tukey–Kramer test ( $p < 0.05$ ), in the

659 “polarized” and “not polarized” patterns. (G) GFPenvy-D4H was exclusively distributed to

660 the bud in a cell highly expressing Sfk1-mCherry. The brightness is not adjusted after

661 background subtraction. The right panel represents the fluorescence intensity profile

662 quantified as in (C). Bars, 3  $\mu$ m.

663

664 **Discussion**

665 More than two decades have passed since the first report on the asymmetric distribution of  
666 phospholipids in the PM [3], but our understanding of its physiological significance is still  
667 limited. Our genetic screening reveals that the loss of Dnf1/2-Lem3 and Dnf3-Crf1 flippases  
668 and Sfk1 results in severe growth defects, provably due to loss of ergosterol from the PM.  
669 Dnf3 was shown to be involved in some PM functions, including mating pheromone  
670 signaling [21] and pseudohyphal growth [35], but this is the first demonstration of Dnf3  
671 involvement in essential cell function in a vegetative cell.

672 Disruption of phospholipid asymmetry is one main reason for the loss of ergosterol  
673 from the PM in the triple mutant. Phospholipids interact with sterol via their headgroups and  
674 acyl chains, which contributes to ordering membrane lipids and securing lipid packing [99].  
675 In the *crf1Δ lem3Δ sfk1* triple mutants, PS and PE are more exposed to the extracellular  
676 leaflet than in the double mutants, and the level of PS in the cytoplasmic leaflet appears to be  
677 decreased. Sterols have a higher affinity to phospholipids containing saturated acyl chains  
678 than those containing unsaturated acyl chains [99], and PS and PE species in the PM are more  
679 abundant in those containing saturated acyl chains than in other organelles in budding yeast  
680 [100]. In addition, according to the umbrella model [99], phospholipid head groups in the  
681 membrane shield nonpolar cholesterol bodies from the aqueous phase. PS with a large

682 headgroup has a higher affinity for cholesterol than other phospholipids [48, 101]. Therefore,  
683 ergosterol, which is also enriched in the cytoplasmic leaflet [102], loses favorable interacting  
684 partners in the triple mutant. This would result in a vast increase in “active ergosterol”, which  
685 may be actively removed from the PM by sterol transfer proteins (STPs) (see below).

686         Although Sfk1 is implicated in the regulation of phospholipid asymmetry (Fig 2) [39],  
687 its protein function remains unknown. Our results that overexpression of Sfk1 excludes  
688 GFPenvy-D4H from the mother cell PM suggest that Sfk1 may be functionally relevant to  
689 ergosterol. GFPenvy-D4H preferentially localized to the daughter cell PM. However, the  
690 ergosterol contents in the cytoplasmic leaflet did not seem to be significantly different  
691 between daughter and mother cell PMs because filipin uniformly stained both membranes  
692 and because ergosterol is predominantly localized to the cytoplasmic leaflet of the PM,  
693 including mother cells [102]. Thus, the differential GFPenvy-D4H localization might reflect  
694 different physical states of ergosterol. When sterol levels exceed the interacting capacity of  
695 phospholipids in the membrane, a sterol molecule is predicted to be exposed to the surface of  
696 the membrane, which increases the chance of its interaction with sterol-sensing proteins. The  
697 model defines this behavior as the chemical activation of cholesterol [99, 103-107]. It has  
698 been suggested that the D4-containing domain of perfringolysin O preferentially interacts  
699 with active cholesterol [104]. Thus, we propose that the chemical activity of ergosterol is  
700 higher in the PM of daughter cells than in that of mother cells. The PM of daughter cells is

701 mainly made from newly synthesized lipids by polarized vesicle transport [108]. In this  
702 membrane, PE and PS are exposed, and Dnf1/2-Lem3 flippases actively flip these  
703 phospholipids to the cytoplasmic leaflet [12, 28]. Thus, phospholipid asymmetry seems to be  
704 more established in the PM of mother cells. Sfk1, which is mainly localized to the mother  
705 cell PM, might be involved in the maintenance of phospholipid asymmetry; our previous  
706 results suggest that Sfk1 represses spontaneous transbilayer movement of phospholipids [39].  
707 This is consistent with the notion that Sfk1 may promote lipid packing in the PM. An  
708 interesting possibility is that Sfk1 enhances interactions between ergosterol and  
709 phospholipids, and thus, Sfk1 decreases active ergosterol.

710 The main localization sites were different between Dnf1/2-Lem3 and Sfk1, and the  
711 localization of Dnf3-Crf1 in the PM has not been clearly shown in the wild-type. However,  
712 simultaneous loss of these proteins leads to severe disorganization of the PM, in which active  
713 ergosterol would be highly increased due to a reduced shielding effect by phospholipids and  
714 reduced lipid packing. The ergosterol in the triple mutant appears to be highly accessible and  
715 easily extracted by STPs, resulting in the loss of ergosterol from the PM. Some STPs,  
716 including those yet to be identified, seem to be involved in sterol transfer from the PM. These  
717 include oxysterol binding protein homologs (Osh) and lipid transfer proteins anchored at a  
718 membrane contact site (LAMs) with StArkin domains [67, 109].

719 Our finding that ergosterol lost from the PM accumulated in LDs as esterified

720 ergosterol is consistent with studies using exogenously added ergosterols [87, 110]. The PM  
721 has a much higher ergosterol concentration than the ER, but ergosterol transport by STPs  
722 between these membranes is kept in equilibrium because the active ergosterol concentration  
723 seems to be similar in these membranes; the ER membrane contains less saturated  
724 phospholipids, and thus ergosterol in the ER is not shielded by surrounding phospholipids  
725 [109]. In the *crf1Δ lem3Δ sfk1* triple mutants, a vast increase in active ergosterol occurs in the  
726 PM, and STPs transport these ergosterols to the ER, in which ergosterol is esterified by  
727 Are1/Are2 to form LDs, until the active ergosterol concentration in the PM is balanced with  
728 that in the ER. The *are2Δ* mutation increases active ergosterol in the ER due to defective  
729 esterification, and this ergosterol would be transferred to the PM, resulting in the partial  
730 suppression of growth defects in the triple mutant. Interestingly, in the triple mutant,  
731 abnormal ER structures accumulated around the perinuclear ER, and Kes1-GFP was localized  
732 to these structures. Because overexpression of Kes1 partially suppressed the growth defect of  
733 the triple mutant, those Kes1-GFP signals might reflect Kes1 in the transport cycle of  
734 ergosterol between the ER and the PM.

735         How sterols are maintained at a high concentration in the PM has been a longstanding  
736 question in membrane biology. Phospholipid asymmetry, a conserved feature in the PM, has  
737 been implicated in this role [6], but genetic analyses of flippases did not clearly demonstrate  
738 that they function in the retention of sterols in the PM. Our results have revealed that

739 flippases actually play an essential role in retaining ergosterol in the PM, but the  
740 identification of an additional factor, Sfk1, which is totally different from flippases, was  
741 essential. Our work indicates that unbiased genetic screening is a powerful approach to  
742 understanding cellular mechanisms that are regulated by a different set of proteins. Because  
743 Sfk1 is conserved as TMEM150A in mammalian cells [40], cholesterol might be retained in  
744 the PM via a similar mechanism.

745

## 746 **Materials and Methods**

### 747 **Media and chemicals**

748 General chemicals were purchased from Wako Pure Chemicals Industry (Osaka, Japan)  
749 unless otherwise stated. Papuamide B was from the collection of R. Andersen. Duramycin  
750 was purchased from Sigma-Aldrich (St. Louis, MO, U.S.A). Yeast strains were grown in  
751 YPDA-rich medium (1% yeast extract [Difco Laboratories, Detroit, MI, U.S.A.], 2%  
752 Bacto-peptone [Difco], 2% glucose, and 0.01% adenine). Strains carrying plasmids were  
753 grown in SD synthetic medium (0.67% yeast nitrogen base without amino acids [Difco] and  
754 2% glucose) that contained the required nutritional supplements [111]. The SDA medium  
755 was SD medium that contained 0.5% casamino acid (Difco). For the induction of the *GALI*  
756 promoter, 3% galactose and 0.2% sucrose were used as carbon sources (YPGA and SGA-Ura  
757 media).



758

## 759 **Yeast strain manipulations and plasmid construction**

760 The yeast strains and plasmids used in this study are listed in S1 and S2 Table, respectively.

761 Standard genetic manipulations of yeast strains were performed according to previously

762 described methods [112]. The polymerase chain reaction (PCR)-based procedure was used to

763 construct yeast strains carrying a complete gene deletion or a gene fusion with either GFP,

764 mCherry, or mRFP1 [113-115]. The amplified DNA fragments were introduced into

765 appropriate strains, and transformants were selected on appropriate plate media. Yeast

766 transformations were performed using the lithium acetate method [116, 117]. All constructs

767 that were produced by the PCR-based procedure were verified by colony PCR to confirm that

768 the replacement or insertion occurred at the expected locus.

769 When the cell growth phenotype was examined by spot assay, cells were cultured in

770 appropriate medium overnight, adjusted to  $OD_{600} = 0.64$ , and then 10-fold serial dilutions

771 were spotted onto the indicated plates.

772 Strains carrying *3xGFP* or *3xmCherry* at genomic loci were constructed as follows.

773 pBluescript SK+ (pBSK)-*3xGFP-Candida albicans URA3 (CaURA3)* was constructed by

774 subcloning *3xGFP* from pBSK-*SJL2-3xGFP* [118, 119] (a gift from Drubin, D. G.), *ADHI*

775 terminator, and *CaURA3* into pBSK. Then, a DNA fragment of *SFK1*, *VPH1*, or *DNF3*,

776 which encodes the C-terminal region, was inserted upstream of *3xGFP* in

777 pBSK-3xGFP-CaURA3. The resulting plasmids were linearized by cutting at a unique  
778 restriction enzyme site in the target gene, followed by transformation into yeast strains.  
779 Stable URA<sup>+</sup> transformants were selected and screened for proper targeting by colony PCR.  
780 pBSK-SFK1-3xmCherry-CaURA3 was constructed by replacing 3xGFP with 3xmCherry.  
781 After stable SFK1-3xmCherry::CaURA3 transformants were obtained, CaURA3 was replaced  
782 with the KanMX6 cassette by marker fragment transformation.  
783 GFP-evt-2PH, GFP-ER (*GFPenvy-SCS2*<sup>220-244</sup>), and *upc2-1* were cloned into  
784 pRS306-based vectors and expressed at the *URA3* locus as follows.  
785 pRS306-*P<sub>TPII</sub>*-GFP-evt-2PH-*T<sub>ADHI</sub>* was constructed by replacing mCherry of  
786 pRS306-*P<sub>TPII</sub>*-mCherry-evt-2PH-*T<sub>ADHI</sub>* [120] with GFP. The GFP-ER fragment was  
787 generated by PCR with the 3' primer containing the *SCS2*<sup>220-244</sup> coding region using  
788 pColdI-GFPenvy-D4H as a template and inserted into pRS306-*P<sub>TPII</sub>*-*T<sub>ADHI</sub>*. The *upc2-1*  
789 (G888D) mutant fragment (-800 to +380 bp of the *UPC2* gene) was generated by the standard  
790 two-step PCR mutagenesis technique and inserted into pRS306. These plasmids were  
791 linearized by cutting at a unique restriction enzyme site in *URA3* and inserted into the *URA3*  
792 locus.

793 To express *OSH* genes on a multicopy plasmid, DNA sequences encoding *OSH* genes  
794 were amplified by PCR and subcloned into either YEplac195, YEplac195-*KanMX6*, or  
795 YEplac181 plasmids. Sterol binding-deficient *KESI* mutants [72] were generated by the

796 standard two-step PCR mutagenesis technique and subcloned into YEplac195. To express the  
797 *SFK1-mCherry* fusion gene on a multicopy plasmid, the *SFK1-mCherry* fragment was  
798 generated by overlap extension PCR and subcloned into YEplac181.

799 To express GFP-D4H and GFPenvy-D4H in *Escherichia coli*, the D4H (D4<sup>D434S</sup>)  
800 mutant fragment was generated by the standard two-step PCR mutagenesis technique using  
801 pColdI-mCherry-D4 as a template [121]. The GFP and D4H fragments were inserted into  
802 pColdI (Takara bio, Shiga, Japan) to construct pColdI-GFP-D4H. To construct  
803 pColdI-GFPenvy-D4H, GFPenvy DNA [79] was newly synthesized with codon optimization  
804 for *S. cerevisiae* (GeneArt™ Strings, Thermo Scientific, Carlsbad, CA, U.S.A.) and amplified  
805 by PCR. pColdI-GFPenvy-D4H was constructed by replacing GFP in pColdI-GFP-D4H with  
806 this GFPenvy fragment. To express GFP-D4H and GFPenvy-D4H in yeast, the corresponding  
807 DNA fragments were inserted into pRS316-*P<sub>TPII</sub>-T<sub>ADHI</sub>*.

808 Schemes detailing the construction of plasmids are available on request.

809

### 810 **Isolation of temperature-sensitive mutations of *SFKI***

811 The ts *sfk1-2* strain was constructed by PCR-based random mutagenesis as follows. The  
812 approximately 1.2 kbp *SFKI* DNA fragment, which corresponds to the region between the  
813 40-bp upstream and 197-bp downstream sequences of the *SFKI* gene, was PCR-amplified  
814 under a mutagenic condition [122] using the genomic DNA of the wild-type (YKT38) as a

815 template. On the other hand, the *Kluyveromyces lactis* *LEU2* (*KILEU2*) cassette DNA  
816 fragment was PCR-amplified under standard conditions using pUG73 (Euroscarf) as a  
817 template. In these PCRs, the primers contained additional sequences, so the *SFK1* and  
818 *KILEU2* fragments had overlapping sequences at their 3' and 5' regions, respectively. Then,  
819 these fragments were used for overlap extension PCR with 5' (*SFK1*) and 3' (*KILEU2*)  
820 primers to generate the *SFK1-KILEU2* fragment. This fragment was introduced into  
821 YKT2386 (*MATa crf1Δ::HphMX4 lem3Δ::TRP1 SFK1-GFP::KanMX6*), and the  
822 transformants were selected at 30°C for LEU<sup>+</sup> first and then for G418-sensitive phenotypes.  
823 Of these transformants, 265 clones were screened for those that showed growth defects at  
824 37°C. Eight clones were isolated and backcrossed with YKT2332 (*MATa crf1Δ::HphMX4*  
825 *lem3Δ::TRP1*) three times. The *crf1Δ::HphMX4 lem3Δ::TRP1 sfk1-2::KILEU2*, which  
826 exhibited the tightest ts phenotype, was chosen for further analyses. Sequences of PCR  
827 primers used are available on request.

828

### 829 **Isolation of mutants synthetically lethal with the *lem3Δ sfk1Δ* mutations**

830 Mutants synthetically lethal with *lem3Δ sfk1Δ* were isolated according to the procedures  
831 described previously [123]. From  $1 \times 10^4$  mutagenized cells screened, three single recessive  
832 mutations were identified by genetic analyses, and the corresponding wild-type genes were  
833 cloned. These genes encode *CRF1*, *DNF3*, and *ANY1/CFS1* [124, 125]. Null mutations of

834 these genes were confirmed to be synthetically sick or lethal with *lem3Δ sfk1Δ*.

835

### 836 **Isolation of multicopy suppressors of the *crf1Δ lem3Δ sfk1-2* mutant**

837 The *crf1Δ lem3Δ sfk1-2* mutant (YKT2340) was transformed with a yeast genomic DNA

838 library constructed in the multicopy plasmid YEp24 [126]. Transformants were selected on

839 SDA-Ura plates. The plates were incubated at 25°C for 2 d and then shifted to 37°C,

840 followed by incubation for 3 d. Approximately  $1 \times 10^6$  transformants were screened, and 186

841 clones were isolated. To exclude clones that carried *LEM3* or *SFK1*, the sensitivity of the

842 clones to duramycin and cycloheximide was examined [39]. Plasmids were recovered from

843 yeast and reintroduced into the original mutant to confirm the suppression of growth defects.

844 As a result, ten different genomic regions were found to be responsible for suppression by

845 DNA sequencing. The clones that contained a gene relevant to phospholipid asymmetry or

846 lipid metabolism were further analyzed, and *KESI*, *CHO1*, and *CFS1* were identified as

847 suppressors.

848

### 849 **Microscopic observations**

850 For observation of proteins fused to a fluorescent protein in living cells, cells were grown

851 under the indicated conditions to mid-log phase (OD<sub>600</sub> of 0.8–1.2), collected, mounted on a

852 microslide glass, and immediately observed. Cells were observed under a Nikon ECRIPS

853 E800 microscope (Nikon Instech, Tokyo, Japan) as described previously [14].

854           Staining of PE exposed to the extracellular leaflet of the PM was performed using the  
855 Bio-Ro as described previously [39]. Immunofluorescence staining of Pma1 was performed  
856 as described previously [127]. For staining with filipin, cells were grown in YPDA to mid-log  
857 phase and fixed with 3.8% formaldehyde for 10 min at room temperature. The fixed cells  
858 were washed twice with phosphate-buffered saline (PBS) and resuspended in PBS containing  
859 2.5 mg/mL filipin complex (Sigma-Aldrich). After incubation at room temperature for 15 min  
860 in the dark, cells were washed with PBS once and observed with a UV filter set. For TF-Chol  
861 labeling, the cells harboring the *upc2-1* mutation were precultured overnight in YPDA and  
862 diluted into YPDA containing 0.5% Tween-80, 0.5% ethanol, and 10 µg/mL TF-Chol (Avanti  
863 polar lipids, Inc. Alabaster, AL, U.S.A.). The cells were incubated at 30°C for 3 h and then  
864 shifted to 37°C, followed by 6 h of incubation. Cells were collected, washed twice with fresh  
865 SD medium, resuspended in SD medium, and observed with a GFP filter set. Nile red  
866 staining of LDs was performed as described previously with minor modifications [128]. Five  
867 OD<sub>600</sub> units of cell culture were collected and resuspended in 100 µL PBS containing 50  
868 µg/mL Nile red (Sigma-Aldrich). After brief mixing, the cell suspension was incubated for 15  
869 min at room temperature in the dark. Cells were collected, washed five times with PBS,  
870 resuspended in PBS, and observed with a G-2A filter set.

871           Endocytosis was examined by internalization of FM4-64 as described previously with

872 minor modifications [123]. Cells were incubated in YPDA at 30°C for 3 h and then shifted to  
873 37°C, followed by 6 h of incubation. Four OD<sub>600</sub> units of the cells were labeled with 32 μM  
874 FM4-64 (Invitrogen, Madison, WI, U.S.A.) in YPDA on ice for 30 min and then washed once  
875 with ice-cold YPDA. Internalization of FM4-64 was initiated by the addition of prewarmed  
876 YPDA, and the cells were incubated at 37°C for 30 min, followed by microscopic  
877 observation.

878

### 879 **Image analysis**

880 Microscopy image analysis was performed with ImageJ. When the Kes1-GFP-positive  
881 abnormal structures were examined, the diameter of the Kes1-GFP signal was measured, and  
882 cells with structures larger than approximately 800 nm were classified as having Kes1  
883 abnormal structures.

884 The PM fluorescence intensity (filipin, Bio-Ro, and Sfk1-mCherry) was analyzed  
885 using programmed Macros in ImageJ as follows. (1) The background was subtracted, (2) a  
886 cell was selected and its mean fluorescence intensity was quantified ( $F_{\text{whole cell}}$ ), (3) the cell  
887 periphery (0.2 μm width, 2 pixels) was selected as the PM and its mean fluorescence  
888 intensity was quantified ( $F_{\text{pm}}$ ), and (4) the signal ratio of the mean  $F_{\text{pm}}/F_{\text{whole cell}}$  was  
889 calculated.

890 To analyze the intensity profile of GFPenvy-D4H, the cell periphery was traced with a

891 2 pixel-wide freehand line tool along the PM of the bud and mother cell. Then, the  
892 fluorescence intensity was measured and plotted. The GFPenvy-D4H localization pattern was  
893 categorized into three patterns as follows. The PM of budded cells was divided into three  
894 regions, the bud PM (bud), the mother cell PM proximal to the bud neck (proximal to bud),  
895 and the mother cell PM distal to the bud neck (distal to bud), and the mean fluorescence  
896 intensity of each region was calculated as  $F_{\text{bud}}$ ,  $F_{\text{proximal to bud}}$ , and  $F_{\text{distal to bud}}$ , respectively. Then,  
897 the cells were categorized as “polarized” ( $F_{\text{proximal to bud}}$  is smaller than 20% of  $F_{\text{bud}}$ ), “partially  
898 polarized” ( $F_{\text{proximal to bud}}$  is larger than, but  $F_{\text{distal to bud}}$  is smaller than, 20% of  $F_{\text{bud}}$ ), or “not  
899 polarized” ( $F_{\text{distal to bud}}$  is larger than 20% of  $F_{\text{bud}}$ ).

900

#### 901 **Rhodamine uptake assay**

902 The rhodamine uptake assay was performed essentially as described previously [39].

903

#### 904 **Sucrose density gradient fractionation**

905 Sucrose density gradient fractionation was performed as described previously [13, 87] with  
906 minor modifications. Cells were grown at 30°C to mid-log phase in 200 mL YPDA medium  
907 and collected. Cells were converted to spheroplasts with zymolyase (Nacalai Tesque, Kyoto,  
908 Japan) and broken using a multi-bead shocker (Yasui-Kikai, Osaka, Japan) in break buffer



909 (1.2 M sorbitol, 20 mM HEPES at pH 7.5, 1 mM EDTA, and protease inhibitor cocktail  
910 [Nacalai Tesque]). After a 1,000 g spin for 10 min, the resulting supernatant was additionally  
911 spun at 13,000 g for 20 min to generate pellet. The step gradient of sucrose was prepared with  
912 the following concentrations: 1 mL 60%, 2.5 mL 50%, 2.5 mL 47%, 2 mL 44%, 1 mL 40%, 1  
913 mL 37%, 1 mL 32%, and 0.5 mL 27% (wt/wt) sucrose in a gradient buffer (10 mM  
914 HEPES–KOH at pH 7.2 and 1 mM EDTA). The pellet was resuspended in 0.5 mL of the  
915 gradient buffer and loaded on the top of the gradient and then centrifuged at 200,000 g in the  
916 P40ST rotor (Hitachi, Tokyo, Japan) for 16 h at 4°C. Fractions (0.9 mL) were manually  
917 collected from the top of the samples. Pdr5-GFP, Pma1, and Kex2 were detected in each  
918 fraction by Western blotting with anti-GFP (Nacalai Tesque), anti-Pma1 (a gift from Serrano  
919 R.), and anti-Kex2 antibodies (a gift from Nothwehr S.), respectively.

920

#### 921 **Lipid analysis**

922 Cells were grown at 30°C to mid-log phase in 250 mL YPDA medium and collected. Total  
923 lipids were extracted by the Bligh and Dyer method [129]. Phospholipid amounts were  
924 determined by phosphorus assay [130]. For the phospholipid analysis, samples containing  
925 200 nmol phosphates were subjected to thin-layer chromatography (TLC) plates (Merck,  
926 Darmstadt, Germany), and phospholipids were detected as described previously [39]. To  
927 detect free and esterified ergosterol, lipid extracts containing 20 nmol phosphates were

928 subjected to high-performance TLC (Merck) separation with hexane/diethyl ether/formic acid  
929 (40:10:2, v:v:v). Ergosterols were stained with a mixture of ferric chloride/sulfuric acid/acetic  
930 acid by heating [131], and the spots were scanned by an image analyzer. The ergosterol  
931 content was determined by TLC-densitometric analysis using ImageJ.

932

### 933 **Liposome sedimentation assay**

934 Recombinant GFP-D4H and GFPenvy-D4H proteins were prepared from *Escherichia coli* as  
935 described previously [121]. The protein concentrations were determined by BCA assay.

936 Multilamellar liposomes were prepared by combining  
937 1,2-Dioleoyl-sn-glycero-3-phosphocholine (DOPC, NOF Corporation, Tokyo, Japan) with  
938 cholesterol or ergosterol from chloroform stocks. The lipid mixture was evaporated under a  
939 stream of nitrogen gas. Then, liposome buffer (0.1 M sucrose, 20 mM HEPES at pH 7.5, 100  
940 mM KCl, and 1 mM EDTA) was added to the dry lipids, and the suspension was vortexed to  
941 produce liposomes. D4H binding to liposomes was analyzed as described previously [132]  
942 with minor modifications. Recombinant GFP- or GFPenvy-D4H protein (200 nmol) was  
943 incubated with liposomes (final total lipid concentration is 100  $\mu$ M) in HEPES-buffered  
944 saline (pH 7.5) for 30 min at room temperature. Then, the mixtures were centrifuged at  
945 21,600 g for 10 min at 25°C. The pellets were washed with HEPES-buffered saline twice.  
946 The pellets were subjected to SDS-PAGE followed by Coomassie Brilliant Blue staining. For

947 the quantification of the protein, the stained gel was scanned and analyzed by ImageJ.

948

### 949 **Statistical analysis**

950 To compare the means of multiple groups, statistical analyses were performed using one-way

951 ANOVA followed by Tukey-Kramer multiple comparisons. A p-value <0.05 was regarded as

952 significant. The dataset containing the numerical data and statistical analysis used in this

953 study is listed in S3 Table.

954

### 955 **Acknowledgments**

956 We thank Shan Gao for her contribution to the initial stage of this work. We also would like

957 to thank David G Drubin (University of California, Berkeley) and Toshihide Kobayashi

958 (University of Strasbourg) for plasmids, Ramon Serrano (Polytechnic University of Valencia)

959 for the anti-Pma1 antibody, and Steven F Nothwehr (University of Missouri) for the

960 anti-Kex2 antibody. We thank Masato Umeda (Kyoto University) for providing Bio-Ro and

961 Tomohiko Taguchi (Tohoku University) for his helpful comments on evt-2PH. This work was

962 supported by the Japanese Society for the Promotion of Science (JSPS) KAKENHI grants

963 JP18K06104 (T.K.), JP18K14645 (T.M.), and JP19K06536 (K.T.). This work was partly

964 supported by the Photo-excitonix Project at Hokkaido University.

965

966 **References**

967

968 1. van Meer G. Dynamic transbilayer lipid asymmetry. *Cold Spring Harb Perspect Biol.*

969 2011; 3(5): a004671. doi: 10.1101/cshperspect.a004671.

970 2. Murate M, Abe M, Kasahara K, Iwabuchi K, Umeda M, Kobayashi T. Transbilayer

971 distribution of lipids at nano scale. *J Cell Sci.* 2015; 128(8): 1627-38. doi:

972 10.1242/jcs.163105.

973 3. Zachowski A. Phospholipids in animal eukaryotic membranes: transverse asymmetry

974 and movement. *Biochem J.* 1993; 294 (Pt 1): 1-14. doi: 10.1042/bj2940001.

975 4. Andersen JP, Vestergaard AL, Mikkelsen SA, Mogensen LS, Chalat M, Molday RS.

976 P4-ATPases as Phospholipid Flippases-Structure, Function, and Enigmas. *Front Physiol.*

977 2016; 7: 275. doi: 10.3389/fphys.2016.00275.

978 5. Hankins HM, Baldrige RD, Xu P, Graham TR. Role of flippases, scramblases and

979 transfer proteins in phosphatidylserine subcellular distribution. *Traffic.* 2015; 16(1): 35-47.

980 doi: 10.1111/tra.12233.

981 6. Panatala R, Hennrich H, Holthuis JC. Inner workings and biological impact of

982 phospholipid flippases. *J Cell Sci.* 2015; 128(11): 2021-32. doi: 10.1242/jcs.102715.

- 983 7. Neumann J, Rose-Sperling D, Hellmich UA. Diverse relations between ABC  
984 transporters and lipids: An overview. *Biochim Biophys Acta Biomembr.* 2017; 1859(4):  
985 605-18. doi: 10.1016/j.bbamem.2016.09.023.
- 986 8. Quazi F, Molday RS. Lipid transport by mammalian ABC proteins. *Essays Biochem.*  
987 2011; 50(1): 265-90. doi: 10.1042/bse0500265.
- 988 9. Nagata S, Sakuragi T, Segawa K. Flippase and scramblase for phosphatidylserine  
989 exposure. *Curr Opin Immunol.* 2020; 62: 31-8. doi: 10.1016/j.coi.2019.11.009.
- 990 10. Hua Z, Fatheddin P, Graham TR. An essential subfamily of Drs2p-related P-type  
991 ATPases is required for protein trafficking between Golgi complex and endosomal/vacuolar  
992 system. *Mol Biol Cell.* 2002; 13(9): 3162-77. doi: 10.1091/mbc.e02-03-0172.
- 993 11. Lee S, Uchida Y, Wang J, Matsudaira T, Nakagawa T, Kishimoto T, et al. Transport  
994 through recycling endosomes requires EHD1 recruitment by a phosphatidylserine translocase.  
995 *EMBO J.* 2015; 34(5): 669-88. doi: 10.15252/embj.201489703.
- 996 12. Pomorski T, Lombardi R, Riezman H, Devaux PF, van Meer G, Holthuis JC.  
997 Drs2p-related P-type ATPases Dnf1p and Dnf2p are required for phospholipid translocation  
998 across the yeast plasma membrane and serve a role in endocytosis. *Mol Biol Cell.* 2003;  
999 14(3): 1240-54. doi: 10.1091/mbc.e02-08-0501.

- 1000 13. Furuta N, Fujimura-Kamada K, Saito K, Yamamoto T, Tanaka K. Endocytic  
1001 recycling in yeast is regulated by putative phospholipid translocases and the  
1002 Ypt31p/32p-Rcy1p pathway. *Mol Biol Cell*. 2007; 18(1): 295-312. doi:  
1003 10.1091/mbc.e06-05-0461.
- 1004 14. Saito K, Fujimura-Kamada K, Furuta N, Kato U, Umeda M, Tanaka K. Cdc50p, a  
1005 protein required for polarized growth, associates with the Drs2p P-type ATPase implicated in  
1006 phospholipid translocation in *Saccharomyces cerevisiae*. *Mol Biol Cell*. 2004; 15(7): 3418-32.  
1007 doi: 10.1091/mbc.e03-11-0829.
- 1008 15. Chen CY, Ingram MF, Rosal PH, Graham TR. Role for Drs2p, a P-type ATPase and  
1009 potential aminophospholipid translocase, in yeast late Golgi function. *J Cell Biol*. 1999;  
1010 147(6): 1223-36. doi: 10.1083/jcb.147.6.1223.
- 1011 16. Gall WE, Geething NC, Hua Z, Ingram MF, Liu K, Chen SI, et al. Drs2p-dependent  
1012 formation of exocytic clathrin-coated vesicles in vivo. *Curr Biol*. 2002; 12(18): 1623-7. doi:  
1013 10.1016/s0960-9822(02)01148-x.
- 1014 17. Mioka T, Fujimura-Kamada K, Tanaka K. Asymmetric distribution of  
1015 phosphatidylserine is generated in the absence of phospholipid flippases in *Saccharomyces*  
1016 *cerevisiae*. *Microbiologyopen*. 2014; 3(5): 803-21. doi: 10.1002/mbo3.211.
- 1017 18. Tanaka Y, Ono N, Shima T, Tanaka G, Katoh Y, Nakayama K, et al. The

- 1018 phospholipid flippase ATP9A is required for the recycling pathway from the endosomes to  
1019 the plasma membrane. *Mol Biol Cell*. 2016; 27(24): 3883-93. doi:  
1020 10.1091/mbc.E16-08-0586.
- 1021 19. Hachiro T, Yamamoto T, Nakano K, Tanaka K. Phospholipid flippases Lem3p-Dnf1p  
1022 and Lem3p-Dnf2p are involved in the sorting of the tryptophan permease Tat2p in yeast. *J*  
1023 *Biol Chem*. 2013; 288(5): 3594-608. doi: 10.1074/jbc.M112.416263.
- 1024 20. Segawa K, Kurata S, Yanagihashi Y, Brummelkamp TR, Matsuda F, Nagata S.  
1025 Caspase-mediated cleavage of phospholipid flippase for apoptotic phosphatidylserine  
1026 exposure. *Science*. 2014; 344(6188): 1164-8. doi: 10.1126/science.1252809.
- 1027 21. Sartorel E, Barrey E, Lau RK, Thorner J. Plasma membrane aminoglycerolipid  
1028 flippase function is required for signaling competence in the yeast mating pheromone  
1029 response pathway. *Mol Biol Cell*. 2015; 26(1): 134-50. doi: 10.1091/mbc.E14-07-1193.
- 1030 22. Paulusma CC, Groen A, Kunne C, Ho-Mok KS, Spijkerboer AL, Rudi de Waart D, et  
1031 al. Atp8b1 deficiency in mice reduces resistance of the canalicular membrane to hydrophobic  
1032 bile salts and impairs bile salt transport. *Hepatology*. 2006; 44(1): 195-204. doi:  
1033 10.1002/hep.21212.
- 1034 23. Saito K, Fujimura-Kamada K, Hanamatsu H, Kato U, Umeda M, Kozminski KG, et  
1035 al. Transbilayer phospholipid flipping regulates Cdc42p signaling during polarized cell

- 1036 growth via Rga GTPase-activating proteins. *Dev Cell*. 2007; 13(5): 743-51. doi:  
1037 10.1016/j.devcel.2007.09.014.
- 1038 24. Das A, Slaughter BD, Unruh JR, Bradford WD, Alexander R, Rubinstein B, et al.  
1039 Flippase-mediated phospholipid asymmetry promotes fast Cdc42 recycling in dynamic  
1040 maintenance of cell polarity. *Nat Cell Biol*. 2012; 14(3): 304-10. doi: 10.1038/ncb2444.
- 1041 25. Iwamoto K, Kobayashi S, Fukuda R, Umeda M, Kobayashi T, Ohta A. Local  
1042 exposure of phosphatidylethanolamine on the yeast plasma membrane is implicated in cell  
1043 polarity. *Genes Cells*. 2004; 9(10): 891-903. doi: 10.1111/j.1365-2443.2004.00782.x.
- 1044 26. Kato U, Inadome H, Yamamoto M, Emoto K, Kobayashi T, Umeda M. Role for  
1045 phospholipid flippase complex of ATP8A1 and CDC50A proteins in cell migration. *J Biol*  
1046 *Chem*. 2013; 288(7): 4922-34. doi: 10.1074/jbc.M112.402701.
- 1047 27. Tanaka K, Fujimura-Kamada K, Yamamoto T. Functions of phospholipid flippases. *J*  
1048 *Biochem*. 2011; 149(2): 131-43. doi: 10.1093/jb/mvq140.
- 1049 28. Kato U, Emoto K, Fredriksson C, Nakamura H, Ohta A, Kobayashi T, et al. A novel  
1050 membrane protein, Ros3p, is required for phospholipid translocation across the plasma  
1051 membrane in *Saccharomyces cerevisiae*. *J Biol Chem*. 2002; 277(40): 37855-62. doi:  
1052 10.1074/jbc.M205564200.



- 1053 29. Noji T, Yamamoto T, Saito K, Fujimura-Kamada K, Kondo S, Tanaka K. Mutational  
1054 analysis of the Lem3p-Dnf1p putative phospholipid-translocating P-type ATPase reveals  
1055 novel regulatory roles for Lem3p and a carboxyl-terminal region of Dnf1p independent of the  
1056 phospholipid-translocating activity of Dnf1p in yeast. *Biochem Biophys Res Commun.* 2006;  
1057 344(1): 323-31. doi: 10.1016/j.bbrc.2006.03.095.
- 1058 30. Takahashi Y, Fujimura-Kamada K, Kondo S, Tanaka K. Isolation and  
1059 characterization of novel mutations in CDC50, the non-catalytic subunit of the Drs2p  
1060 phospholipid flippase. *J Biochem.* 2011; 149(4): 423-32. doi: 10.1093/jb/mvq155.
- 1061 31. Bryde S, Hennrich H, Verhulst PM, Devaux PF, Lenoir G, Holthuis JC. CDC50  
1062 proteins are critical components of the human class-1 P4-ATPase transport machinery. *J Biol*  
1063 *Chem.* 2010; 285(52): 40562-72. doi: 10.1074/jbc.M110.139543.
- 1064 32. Puts CF, Panatala R, Hennrich H, Tsareva A, Williamson P, Holthuis JC. Mapping  
1065 functional interactions in a heterodimeric phospholipid pump. *J Biol Chem.* 2012; 287(36):  
1066 30529-40. doi: 10.1074/jbc.M112.371088.
- 1067 33. Stevens HC, Malone L, Nichols JW. The putative aminophospholipid translocases,  
1068 DNF1 and DNF2, are not required for 7-nitrobenz-2-oxa-1,3-diazol-4-yl-phosphatidylserine  
1069 flip across the plasma membrane of *Saccharomyces cerevisiae*. *J Biol Chem.* 2008; 283(50):  
1070 35060-9. doi: 10.1074/jbc.M802379200.

- 1071 34. Parsons AB, Lopez A, Givoni IE, Williams DE, Gray CA, Porter J, et al. Exploring  
1072 the mode-of-action of bioactive compounds by chemical-genetic profiling in yeast. *Cell*.  
1073 2006; 126(3): 611-25. doi: 10.1016/j.cell.2006.06.040.
- 1074 35. Frøsig MM, Costa SR, Liesche J, Østerberg JT, Hanisch S, Nintemann S, et al.  
1075 Pseudohyphal growth in *Saccharomyces cerevisiae* involves protein kinase-regulated lipid  
1076 flippases. *J Cell Sci*. 2020; 133(15): jcs.235994. doi: 10.1242/jcs.235994.
- 1077 36. Nakano K, Yamamoto T, Kishimoto T, Noji T, Tanaka K. Protein kinases Fpk1p and  
1078 Fpk2p are novel regulators of phospholipid asymmetry. *Mol Biol Cell*. 2008; 19(4): 1783-97.  
1079 doi: 10.1091/mbc.E07-07-0646.
- 1080 37. Decottignies A, Grant AM, Nichols JW, de Wet H, McIntosh DB, Goffeau A. ATPase  
1081 and multidrug transport activities of the overexpressed yeast ABC protein Yor1p. *J Biol*  
1082 *Chem*. 1998; 273(20): 12612-22. doi: 10.1074/jbc.273.20.12612.
- 1083 38. Yamauchi S, Obara K, Uchibori K, Kamimura A, Azumi K, Kihara A. Opt2 mediates  
1084 the exposure of phospholipids during cellular adaptation to altered lipid asymmetry. *J Cell*  
1085 *Sci*. 2015; 128(1): 61-9. doi: 10.1242/jcs.153890.
- 1086 39. Mioka T, Fujimura-Kamada K, Mizugaki N, Kishimoto T, Sano T, Nunome H, et al.  
1087 Phospholipid flippases and Sfk1p, a novel regulator of phospholipid asymmetry, contribute to  
1088 low permeability of the plasma membrane. *Mol Biol Cell*. 2018; 29(10): 1203-18. doi:

1089 10.1091/mbc.E17-04-0217.

1090 40. Chung J, Nakatsu F, Baskin JM, De Camilli P. Plasticity of PI4KIIIalpha interactions  
1091 at the plasma membrane. *EMBO Rep.* 2015; 16(3): 312-20. doi: 10.15252/embr.201439151.

1092 41. Lange Y, Steck TL. Active membrane cholesterol as a physiological effector. *Chem*  
1093 *Phys Lipids.* 2016; 199: 74-93. doi: 10.1016/j.chemphyslip.2016.02.003.

1094 42. Radhakrishnan A, Goldstein JL, McDonald JG, Brown MS. Switch-like control of  
1095 SREBP-2 transport triggered by small changes in ER cholesterol: a delicate balance. *Cell*  
1096 *Metab.* 2008; 8(6): 512-21. doi: 10.1016/j.cmet.2008.10.008.

1097 43. Holthuis JC, Menon AK. Lipid landscapes and pipelines in membrane homeostasis.  
1098 *Nature.* 2014; 510(7503): 48-57. doi: 10.1038/nature13474.

1099 44. Ali MR, Cheng KH, Huang J. Assess the nature of cholesterol-lipid interactions  
1100 through the chemical potential of cholesterol in phosphatidylcholine bilayers. *Proc Natl Acad*  
1101 *Sci U S A.* 2007; 104(13): 5372-7. doi: 10.1073/pnas.0611450104.

1102 45. Almeida PF. Thermodynamics of lipid interactions in complex bilayers. *Biochim*  
1103 *Biophys Acta.* 2009; 1788(1): 72-85. doi: 10.1016/j.bbamem.2008.08.007.

1104 46. Lange Y, Steck TL. Cholesterol homeostasis and the escape tendency (activity) of  
1105 plasma membrane cholesterol. *Prog Lipid Res.* 2008; 47(5): 319-32. doi:

1106 10.1016/j.plipres.2008.03.001.

1107 47. Ramstedt B, Slotte JP. Sphingolipids and the formation of sterol-enriched ordered  
1108 membrane domains. *Biochim Biophys Acta*. 2006; 1758(12): 1945-56. doi:

1109 10.1016/j.bbamem.2006.05.020.

1110 48. Maekawa M, Fairn GD. Complementary probes reveal that phosphatidylserine is  
1111 required for the proper transbilayer distribution of cholesterol. *J Cell Sci*. 2015; 128(7):

1112 1422-33. doi: 10.1242/jcs.164715.

1113 49. Lange Y, Tabei SM, Ye J, Steck TL. Stability and stoichiometry of bilayer  
1114 phospholipid-cholesterol complexes: relationship to cellular sterol distribution and  
1115 homeostasis. *Biochemistry*. 2013; 52(40): 6950-9. doi: 10.1021/bi400862q.

1116 50. Munn AL, Stevenson BJ, Geli MI, Riezman H. end5, end6, and end7: mutations that  
1117 cause actin delocalization and block the internalization step of endocytosis in *Saccharomyces*  
1118 *cerevisiae*. *Mol Biol Cell*. 1995; 6(12): 1721-42. doi: 10.1091/mbc.6.12.1721.

1119 51. Boeke JD, LaCroute F, Fink GR. A positive selection for mutants lacking  
1120 orotidine-5'-phosphate decarboxylase activity in yeast: 5-fluoro-orotic acid resistance. *Mol*  
1121 *Gen Genet*. 1984; 197(2): 345-6. doi: 10.1007/BF00330984.

1122 52. Yeung T, Gilbert GE, Shi J, Silvius J, Kapus A, Grinstein S. Membrane

- 1123 phosphatidylserine regulates surface charge and protein localization. *Science*. 2008;  
1124 319(5860): 210-3. doi: 10.1126/science.1152066.
- 1125 53. Uchida Y, Hasegawa J, Chinnapen D, Inoue T, Okazaki S, Kato R, et al. Intracellular  
1126 phosphatidylserine is essential for retrograde membrane traffic through endosomes. *Proc Natl*  
1127 *Acad Sci U S A*. 2011; 108(38): 15846-51. doi: 10.1073/pnas.1109101108.
- 1128 54. Lewis MJ, Nichols BJ, Prescianotto-Baschong C, Riezman H, Pelham HR. Specific  
1129 retrieval of the exocytic SNARE Snc1p from early yeast endosomes. *Mol Biol Cell*. 2000;  
1130 11(1): 23-38. doi: 10.1091/mbc.11.1.23.
- 1131 55. de Thozee CP, Cronin S, Goj A, Golin J, Ghislain M. Subcellular trafficking of the  
1132 yeast plasma membrane ABC transporter, Pdr5, is impaired by a mutation in the N-terminal  
1133 nucleotide-binding fold. *Mol Microbiol*. 2007; 63(3): 811-25. doi:  
1134 10.1111/j.1365-2958.2006.05562.x.
- 1135 56. Malinska K, Malinsky J, Opekarova M, Tanner W. Distribution of Can1p into stable  
1136 domains reflects lateral protein segregation within the plasma membrane of living *S.*  
1137 *cerevisiae* cells. *J Cell Sci*. 2004; 117(Pt 25): 6031-41. doi: 10.1242/jcs.01493.
- 1138 57. Vida TA, Emr SD. A new vital stain for visualizing vacuolar membrane dynamics  
1139 and endocytosis in yeast. *J Cell Biol*. 1995; 128(5): 779-92. doi: 10.1083/jcb.128.5.779.

- 1140 58. Peters C, Bayer MJ, Buhler S, Andersen JS, Mann M, Mayer A. Trans-complex  
1141 formation by proteolipid channels in the terminal phase of membrane fusion. *Nature*. 2001;  
1142 409(6820): 581-8. doi: 10.1038/35054500.
- 1143 59. Serrano R, Kielland-Brandt MC, Fink GR. Yeast plasma membrane ATPase is  
1144 essential for growth and has homology with (Na<sup>+</sup> + K<sup>+</sup>), K<sup>+</sup>- and Ca<sup>2+</sup>-ATPases. *Nature*.  
1145 1986; 319(6055): 689-93. doi: 10.1038/319689a0.
- 1146 60. Bagnat M, Chang A, Simons K. Plasma membrane proton ATPase Pma1p requires  
1147 raft association for surface delivery in yeast. *Mol Biol Cell*. 2001; 12(12): 4129-38. doi:  
1148 10.1091/mbc.12.12.4129.
- 1149 61. Brickner JH, Fuller RS. SOI1 encodes a novel, conserved protein that promotes  
1150 TGN-endosomal cycling of Kex2p and other membrane proteins by modulating the function  
1151 of two TGN localization signals. *J Cell Biol*. 1997; 139(1): 23-36. doi: 10.1083/jcb.139.1.23.
- 1152 62. Popov-Celeketic D, Bianchi F, Ruiz SJ, Meutiawati F, Poolman B. A Plasma  
1153 Membrane Association Module in Yeast Amino Acid Transporters. *J Biol Chem*. 2016;  
1154 291(31): 16024-37. doi: 10.1074/jbc.M115.706770.
- 1155 63. Spira F, Mueller NS, Beck G, von Olshausen P, Beig J, Wedlich-Soldner R.  
1156 Patchwork organization of the yeast plasma membrane into numerous coexisting domains.  
1157 *Nat Cell Biol*. 2012; 14(6): 640-8. doi: 10.1038/ncb2487.

- 1158 64. Zhao Y, Macgurn JA, Liu M, Emr S. The ART-Rsp5 ubiquitin ligase network  
1159 comprises a plasma membrane quality control system that protects yeast cells from  
1160 proteotoxic stress. *Elife*. 2013; 2: e00459. doi: 10.7554/eLife.00459.
- 1161 65. Scharff-Poulsen P, Pedersen PA. *Saccharomyces cerevisiae*-based platform for rapid  
1162 production and evaluation of eukaryotic nutrient transporters and transceptors for  
1163 biochemical studies and crystallography. *PLoS One*. 2013; 8(10): e76851. doi:  
1164 10.1371/journal.pone.0076851.
- 1165 66. Ayscough KR, Stryker J, Pokala N, Sanders M, Crews P, Drubin DG. High rates of  
1166 actin filament turnover in budding yeast and roles for actin in establishment and maintenance  
1167 of cell polarity revealed using the actin inhibitor latrunculin-A. *J Cell Biol*. 1997; 137(2):  
1168 399-416. doi: 10.1083/jcb.137.2.399.
- 1169 67. Antonny B, Bigay J, Mesmin B. The Oxysterol-Binding Protein Cycle: Burning Off  
1170 PI(4)P to Transport Cholesterol. *Annu Rev Biochem*. 2018; 87(1): 809-37. doi:  
1171 10.1146/annurev-biochem-061516-044924.
- 1172 68. Lev S. Non-vesicular lipid transport by lipid-transfer proteins and beyond. *Nat Rev*  
1173 *Mol Cell Biol*. 2010; 11(10): 739-50. doi: 10.1038/nrm2971.
- 1174 69. Manik MK, Yang H, Tong J, Im YJ. Structure of Yeast OSBP-Related Protein Osh1  
1175 Reveals Key Determinants for Lipid Transport and Protein Targeting at the Nucleus-Vacuole

- 1176 Junction. Structure. 2017; 25(4): 617-29 e3. doi: 10.1016/j.str.2017.02.010.
- 1177 70. Fairn GD, Curwin AJ, Stefan CJ, McMaster CR. The oxysterol binding protein  
1178 Kes1p regulates Golgi apparatus phosphatidylinositol-4-phosphate function. Proc Natl Acad  
1179 Sci U S A. 2007; 104(39): 15352-7. doi: 10.1073/pnas.0705571104.
- 1180 71. Audhya A, Emr SD. Stt4 PI 4-kinase localizes to the plasma membrane and  
1181 functions in the Pkc1-mediated MAP kinase cascade. Dev Cell. 2002; 2(5): 593-605. doi:  
1182 10.1016/s1534-5807(02)00168-5.
- 1183 72. Im YJ, Raychaudhuri S, Prinz WA, Hurley JH. Structural mechanism for sterol  
1184 sensing and transport by OSBP-related proteins. Nature. 2005; 437(7055): 154-8. doi:  
1185 10.1038/nature03923.
- 1186 73. Quon E, Sere YY, Chauhan N, Johansen J, Sullivan DP, Dittman JS, et al.  
1187 Endoplasmic reticulum-plasma membrane contact sites integrate sterol and phospholipid  
1188 regulation. PLoS Biol. 2018; 16(5): e2003864. doi: 10.1371/journal.pbio.2003864.
- 1189 74. Beh CT, Rine J. A role for yeast oxysterol-binding protein homologs in endocytosis  
1190 and in the maintenance of intracellular sterol-lipid distribution. J Cell Sci. 2004; 117(Pt 14):  
1191 2983-96. doi: 10.1242/jcs.01157.
- 1192 75. Kishimoto T, Ishitsuka R, Kobayashi T. Detectors for evaluating the cellular



- 1193 landscape of sphingomyelin- and cholesterol-rich membrane domains. *Biochim Biophys Acta*.  
1194 2016; 1861(8 Pt B): 812-29. doi: 10.1016/j.bbali.2016.03.013.
- 1195 76. Shimada Y, Maruya M, Iwashita S, Ohno-Iwashita Y. The C-terminal domain of  
1196 perfringolysin O is an essential cholesterol-binding unit targeting to cholesterol-rich  
1197 microdomains. *Eur J Biochem*. 2002; 269(24): 6195-203. doi:  
1198 10.1046/j.1432-1033.2002.03338.x.
- 1199 77. Johnson BB, Moe PC, Wang D, Rossi K, Trigatti BL, Heuck AP. Modifications in  
1200 perfringolysin O domain 4 alter the cholesterol concentration threshold required for binding.  
1201 *Biochemistry*. 2012; 51(16): 3373-82. doi: 10.1021/bi3003132.
- 1202 78. Marek M, Vincenzetti V, Martin SG. Sterol biosensor reveals LAM-family  
1203 Ltc1-dependent sterol flow to endosomes upon Arp2/3 inhibition. *J Cell Biol*. 2020; 219(6):  
1204 e202001147. doi: 10.1083/jcb.202001147.
- 1205 79. Slubowski CJ, Funk AD, Roesner JM, Paulissen SM, Huang LS. Plasmids for  
1206 C-terminal tagging in *Saccharomyces cerevisiae* that contain improved GFP proteins, Envy  
1207 and Ivy. *Yeast*. 2015; 32(4): 379-87. doi: 10.1002/yea.3065.
- 1208 80. Bajar BT, Wang ES, Lam AJ, Kim BB, Jacobs CL, Howe ES, et al. Improving  
1209 brightness and photostability of green and red fluorescent proteins for live cell imaging and  
1210 FRET reporting. *Sci Rep*. 2016; 6(1): 20889. doi: 10.1038/srep20889.

- 1211 81. Savinov SN, Heuck AP. Interaction of Cholesterol with Perfringolysin O: What Have  
1212 We Learned from Functional Analysis? *Toxins (Basel)*. 2017; 9(12): 381. doi:  
1213 10.3390/toxins9120381.
- 1214 82. Daum G, Lees ND, Bard M, Dickson R. Biochemistry, cell biology and molecular  
1215 biology of lipids of *Saccharomyces cerevisiae*. *Yeast*. 1998; 14(16): 1471-510. doi:  
1216 10.1002/(sici)1097-0061(199812)14:16<1471::Aid-yea353>3.0.Co;2-y.
- 1217 83. Munn AL, Heese-Peck A, Stevenson BJ, Pichler H, Riezman H. Specific sterols  
1218 required for the internalization step of endocytosis in yeast. *Mol Biol Cell*. 1999; 10(11):  
1219 3943-57. doi: 10.1091/mbc.10.11.3943.
- 1220 84. Heese-Peck A, Pichler H, Zanolari B, Watanabe R, Daum G, Riezman H. Multiple  
1221 functions of sterols in yeast endocytosis. *Mol Biol Cell*. 2002; 13(8): 2664-80. doi:  
1222 10.1091/mbc.e02-04-0186.
- 1223 85. Crowley JH, Leak FW, Jr., Shianna KV, Tove S, Parks LW. A mutation in a purported  
1224 regulatory gene affects control of sterol uptake in *Saccharomyces cerevisiae*. *J Bacteriol*.  
1225 1998; 180(16): 4177-83. doi: 10.1128/JB.180.16.4177-4183.1998.
- 1226 86. Lewis TL, Keesler GA, Fenner GP, Parks LW. Pleiotropic mutations in  
1227 *Saccharomyces cerevisiae* affecting sterol uptake and metabolism. *Yeast*. 1988; 4(2): 93-106.  
1228 doi: 10.1002/yea.320040203.

- 1229 87. Georgiev AG, Sullivan DP, Kersting MC, Dittman JS, Beh CT, Menon AK. Osh  
1230 proteins regulate membrane sterol organization but are not required for sterol movement  
1231 between the ER and PM. *Traffic*. 2011; 12(10): 1341-55. doi:  
1232 10.1111/j.1600-0854.2011.01234.x.
- 1233 88. Barajas D, Xu K, de Castro Martin IF, Sasvari Z, Brandizzi F, Risco C, et al.  
1234 Co-opted oxysterol-binding ORP and VAP proteins channel sterols to RNA virus replication  
1235 sites via membrane contact sites. *PLoS Pathog*. 2014; 10(10): e1004388. doi:  
1236 10.1371/journal.ppat.1004388.
- 1237 89. Klug L, Daum G. Yeast lipid metabolism at a glance. *FEMS Yeast Res*. 2014; 14(3):  
1238 369-88. doi: 10.1111/1567-1364.12141.
- 1239 90. Greenspan P, Mayer EP, Fowler SD. Nile red: a selective fluorescent stain for  
1240 intracellular lipid droplets. *J Cell Biol*. 1985; 100(3): 965-73. doi: 10.1083/jcb.100.3.965.
- 1241 91. Jandrositz A, Petschnigg J, Zimmermann R, Natter K, Scholze H, Hermetter A, et al.  
1242 The lipid droplet enzyme Tgl1p hydrolyzes both steryl esters and triglycerides in the yeast,  
1243 *Saccharomyces cerevisiae*. *Biochim Biophys Acta*. 2005; 1735(1): 50-8. doi:  
1244 10.1016/j.bbailip.2005.04.005.
- 1245 92. Kurat CF, Natter K, Petschnigg J, Wolinski H, Scheuringer K, Scholz H, et al. Obese  
1246 yeast: triglyceride lipolysis is functionally conserved from mammals to yeast. *J Biol Chem*.

- 1247 2006; 281(1): 491-500. doi: 10.1074/jbc.M508414200.
- 1248 93. Yu C, Kennedy NJ, Chang CC, Rothblatt JA. Molecular cloning and characterization  
1249 of two isoforms of *Saccharomyces cerevisiae* acyl-CoA:sterol acyltransferase. *J Biol Chem*.  
1250 1996; 271(39): 24157-63. doi: 10.1074/jbc.271.39.24157.
- 1251 94. Yang H, Bard M, Bruner DA, Gleeson A, Deckelbaum RJ, Aljinovic G, et al. Sterol  
1252 esterification in yeast: a two-gene process. *Science*. 1996; 272(5266): 1353-6. doi:  
1253 10.1126/science.272.5266.1353.
- 1254 95. Dahlqvist A, Stahl U, Lenman M, Banas A, Lee M, Sandager L, et al.  
1255 Phospholipid:diacylglycerol acyltransferase: an enzyme that catalyzes the  
1256 acyl-CoA-independent formation of triacylglycerol in yeast and plants. *Proc Natl Acad Sci U*  
1257 *S A*. 2000; 97(12): 6487-92. doi: 10.1073/pnas.120067297.
- 1258 96. Sorger D, Daum G. Synthesis of triacylglycerols by the acyl-coenzyme  
1259 A:diacyl-glycerol acyltransferase Dga1p in lipid particles of the yeast *Saccharomyces*  
1260 *cerevisiae*. *J Bacteriol*. 2002; 184(2): 519-24. doi: 10.1128/jb.184.2.519-524.2002.
- 1261 97. Oelkers P, Tinkelenberg A, Erdeniz N, Cromley D, Billheimer JT, Sturley SL. A  
1262 lecithin cholesterol acyltransferase-like gene mediates diacylglycerol esterification in yeast. *J*  
1263 *Biol Chem*. 2000; 275(21): 15609-12. doi: 10.1074/jbc.C000144200.

- 1264 98. Caunt P, Impoolsup A, Greenfield PF. Stability of Recombinant Plasmids in Yeast.  
1265 Journal of Biotechnology. 1988; 8(3): 173-92. doi: Doi 10.1016/0168-1656(88)90001-6.
- 1266 99. Mesmin B, Maxfield FR. Intracellular sterol dynamics. Biochim Biophys Acta.  
1267 2009; 1791(7): 636-45. doi: 10.1016/j.bbalip.2009.03.002.
- 1268 100. Schneiter R, Brugger B, Sandhoff R, Zellnig G, Leber A, Lampl M, et al.  
1269 Electrospray ionization tandem mass spectrometry (ESI-MS/MS) analysis of the lipid  
1270 molecular species composition of yeast subcellular membranes reveals acyl chain-based  
1271 sorting/remodeling of distinct molecular species en route to the plasma membrane. J Cell  
1272 Biol. 1999; 146(4): 741-54. doi: 10.1083/jcb.146.4.741.
- 1273 101. Nyholm TKM, Jaikishan S, Engberg O, Hautala V, Slotte JP. The Affinity of Sterols  
1274 for Different Phospholipid Classes and Its Impact on Lateral Segregation. Biophys J. 2019;  
1275 116(2): 296-307. doi: 10.1016/j.bpj.2018.11.3135.
- 1276 102. Solanko LM, Sullivan DP, Sere YY, Szomek M, Lunding A, Solanko KA, et al.  
1277 Ergosterol is mainly located in the cytoplasmic leaflet of the yeast plasma membrane. Traffic.  
1278 2018; 19(3): 198-214. doi: 10.1111/tra.12545.
- 1279 103. Nelson LD, Johnson AE, London E. How interaction of perfringolysin O with  
1280 membranes is controlled by sterol structure, lipid structure, and physiological low pH:  
1281 insights into the origin of perfringolysin O-lipid raft interaction. J Biol Chem. 2008; 283(8):

- 1282 4632-42. doi: 10.1074/jbc.M709483200.
- 1283 104. Flanagan JJ, Tweten RK, Johnson AE, Heuck AP. Cholesterol exposure at the  
1284 membrane surface is necessary and sufficient to trigger perfringolysin O binding.  
1285 *Biochemistry*. 2009; 48(18): 3977-87. doi: 10.1021/bi9002309.
- 1286 105. Steck TL, Lange Y. Cell cholesterol homeostasis: mediation by active cholesterol.  
1287 *Trends Cell Biol*. 2010; 20(11): 680-7. doi: 10.1016/j.tcb.2010.08.007.
- 1288 106. McConnell HM, Radhakrishnan A. Condensed complexes of cholesterol and  
1289 phospholipids. *Biochim Biophys Acta*. 2003; 1610(2): 159-73. doi:  
1290 10.1016/s0005-2736(03)00015-4.
- 1291 107. Maxfield FR, Menon AK. Intracellular sterol transport and distribution. *Curr Opin*  
1292 *Cell Biol*. 2006; 18(4): 379-85. doi: 10.1016/j.ceb.2006.06.012.
- 1293 108. Pruyne D, Legesse-Miller A, Gao L, Dong Y, Bretscher A. Mechanisms of polarized  
1294 growth and organelle segregation in yeast. *Annu Rev Cell Dev Biol*. 2004; 20: 559-91. doi:  
1295 10.1146/annurev.cellbio.20.010403.103108.
- 1296 109. Menon AK. Sterol gradients in cells. *Curr Opin Cell Biol*. 2018; 53: 37-43. doi:  
1297 10.1016/j.ceb.2018.04.012.
- 1298 110. Li Y, Prinz WA. ATP-binding cassette (ABC) transporters mediate nonvesicular,

- 1299 raft-modulated sterol movement from the plasma membrane to the endoplasmic reticulum. *J*
- 1300 *Biol Chem.* 2004; 279(43): 45226-34. doi: 10.1074/jbc.M407600200.
- 1301 111. Rose M. *Methods in yeast genetics: a laboratory course manual*. In: Winston F,
- 1302 Hieter P, editors. Cold Spring Harbor, New York: Cold Spring Harbor Laboratory Press;
- 1303 1990.
- 1304 112. Guthrie C, Fink GR. *Guide to Yeast Genetics and Molecular Biology*. San Diego:
- 1305 Academic Press; 1991.
- 1306 113. Shaner NC, Campbell RE, Steinbach PA, Giepmans BN, Palmer AE, Tsien RY.
- 1307 Improved monomeric red, orange and yellow fluorescent proteins derived from *Discosoma* sp.
- 1308 red fluorescent protein. *Nat Biotechnol.* 2004; 22(12): 1567-72. doi: 10.1038/nbt1037.
- 1309 114. Longtine MS, McKenzie A, 3rd, Demarini DJ, Shah NG, Wach A, Brachat A, et al.
- 1310 Additional modules for versatile and economical PCR-based gene deletion and modification
- 1311 in *Saccharomyces cerevisiae*. *Yeast.* 1998; 14(10): 953-61. doi:
- 1312 10.1002/(SICI)1097-0061(199807)14:10<953::AID-YEA293>3.0.CO;2-U.
- 1313 115. Campbell RE, Tour O, Palmer AE, Steinbach PA, Baird GS, Zacharias DA, et al. A
- 1314 monomeric red fluorescent protein. *Proc Natl Acad Sci U S A.* 2002; 99(12): 7877-82. doi:
- 1315 10.1073/pnas.082243699.

- 1316 116. Gietz RD, Schiestl RH. Quick and easy yeast transformation using the LiAc/SS  
1317 carrier DNA/PEG method. *Nat Protoc.* 2007; 2(1): 35-7. doi: 10.1038/nprot.2007.14.
- 1318 117. Gietz RD, Woods RA. Transformation of yeast by lithium acetate/single-stranded  
1319 carrier DNA/polyethylene glycol method. *Methods Enzymol.* 2002; 350: 87-96. doi:  
1320 10.1016/s0076-6879(02)50957-5.
- 1321 118. Sun Y, Carroll S, Kaksonen M, Toshima JY, Drubin DG. PtdIns(4,5)P<sub>2</sub> turnover is  
1322 required for multiple stages during clathrin- and actin-dependent endocytic internalization. *J*  
1323 *Cell Biol.* 2007; 177(2): 355-67. doi: 10.1083/jcb.200611011.
- 1324 119. Lee WL, Oberle JR, Cooper JA. The role of the lissencephaly protein Pac1 during  
1325 nuclear migration in budding yeast. *J Cell Biol.* 2003; 160(3): 355-64. doi:  
1326 10.1083/jcb.200209022.
- 1327 120. Miyasaka M, Mioka T, Kishimoto T, Itoh E, Tanaka K. A complex genetic  
1328 interaction implicates that phospholipid asymmetry and phosphate homeostasis regulate  
1329 Golgi functions. *PLoS One.* 2020; 15(7): e0236520. doi: 10.1371/journal.pone.0236520.
- 1330 121. Kishimoto T, Tomishige N, Murate M, Ishitsuka R, Schaller H, Mely Y, et al.  
1331 Cholesterol asymmetry at the tip of filopodia during cell adhesion. *FASEB J.* 2020; 34(5):  
1332 6185-97. doi: 10.1096/fj.201900065RR.



- 1333 122. Toi H, Fujimura-Kamada K, Irie K, Takai Y, Todo S, Tanaka K. She4p/Dim1p  
1334 interacts with the motor domain of unconventional myosins in the budding yeast,  
1335 *Saccharomyces cerevisiae*. *Mol Biol Cell*. 2003; 14(6): 2237-49. doi:  
1336 10.1091/mbc.e02-09-0616.
- 1337 123. Kishimoto T, Yamamoto T, Tanaka K. Defects in structural integrity of ergosterol  
1338 and the Cdc50p-Drs2p putative phospholipid translocase cause accumulation of endocytic  
1339 membranes, onto which actin patches are assembled in yeast. *Mol Biol Cell*. 2005; 16(12):  
1340 5592-609. doi: 10.1091/mbc.e05-05-0452.
- 1341 124. van Leeuwen J, Pons C, Mellor JC, Yamaguchi TN, Friesen H, Koschwanez J, et al.  
1342 Exploring genetic suppression interactions on a global scale. *Science*. 2016; 354(6312):  
1343 aag0839. doi: 10.1126/science.aag0839.
- 1344 125. Yamamoto T, Fujimura-Kamada K, Shioji E, Suzuki R, Tanaka K. Cfs1p, a Novel  
1345 Membrane Protein in the PQ-Loop Family, Is Involved in Phospholipid Flippase Functions in  
1346 Yeast. *G3 (Bethesda)*. 2017; 7(1): 179-92. doi: 10.1534/g3.116.035238.
- 1347 126. Botstein D, Falco SC, Stewart SE, Brennan M, Scherer S, Stinchcomb DT, et al.  
1348 Sterile host yeasts (SHY): a eukaryotic system of biological containment for recombinant  
1349 DNA experiments. *Gene*. 1979; 8(1): 17-24. doi: 10.1016/0378-1119(79)90004-0.
- 1350 127. Martinez-Munoz GA, Kane P. Vacuolar and plasma membrane proton pumps

- 1351 collaborate to achieve cytosolic pH homeostasis in yeast. *J Biol Chem.* 2008; 283(29):  
1352 20309-19. doi: 10.1074/jbc.M710470200.
- 1353 128. Verstrepen KJ, Van Laere SD, Vercammen J, Derdelinckx G, Dufour JP, Pretorius IS,  
1354 et al. The *Saccharomyces cerevisiae* alcohol acetyl transferase Atf1p is localized in lipid  
1355 particles. *Yeast.* 2004; 21(4): 367-77. doi: 10.1002/yea.1100.
- 1356 129. Bligh EG, Dyer WJ. A rapid method of total lipid extraction and purification. *Can J*  
1357 *Biochem Physiol.* 1959; 37(8): 911-7. doi: 10.1139/o59-099.
- 1358 130. Rouser G, Fkeischer S, Yamamoto A. Two dimensional thin layer chromatographic  
1359 separation of polar lipids and determination of phospholipids by phosphorus analysis of spots.  
1360 *Lipids.* 1970; 5(5): 494-6. doi: 10.1007/BF02531316.
- 1361 131. Lowry RR. Ferric chloride spray detector for cholesterol and cholesteryl esters on  
1362 thin-layer chromatograms. *J Lipid Res.* 1968; 9(3): 397.
- 1363 132. Ishitsuka R, Saito T, Osada H, Ohno-Iwashita Y, Kobayashi T. Fluorescence image  
1364 screening for chemical compounds modifying cholesterol metabolism and distribution. *J*  
1365 *Lipid Res.* 2011; 52(11): 2084-94. doi: 10.1194/jlr.D018184.

1366

1367 **Supporting Information**

1368

1369 **S1 Fig. Growth curves of wild-type and *crf1*Δ *lem3*Δ *skf1-2* cells.**

1370 Cells were precultured in YPDA medium to the mid-log phase at 30°C. Then, the cells were  
1371 reinoculated in YPDA at time 0 and cultured at 30 or 37°C. Optical density was measured  
1372 every 1.5 h. Values represent the mean ± S.D. from three independent experiments.

1373

1374 **S2 Fig. Phospholipid distributions in the double mutants of *lem3*Δ, *crf1*Δ, *dnf3*Δ, and  
1375 *skf1-2* mutations.**

1376 (A) The *crf1*Δ and *dnf3*Δ mutations increased the sensitivity to PapB and duramycin in the  
1377 *lem3*Δ mutant. Tenfold serial dilutions of the indicated cell cultures were spotted onto a  
1378 YPDA plate containing PapB or duramycin, followed by incubation at 30°C for 2 d. (B) GFP  
1379 -Lact-C2 was normally localized to the PM in the *lem3*Δ *skf1-2*, *crf1*Δ *skf1-2*, and *crf1*Δ  
1380 *lem3*Δ double mutants. Cells were cultured as in Fig 2C. (C) GFP-evt-2PH was normally  
1381 localized to the PM in the *lem3*Δ *skf1-2*, *crf1*Δ *skf1-2*, and *crf1*Δ *lem3*Δ double mutants. Cells  
1382 were cultured as in Fig 2C. Bars, 5 μm.

1383

1384 **S3 Fig. Analysis of phospholipid composition.**

1385 PC, PI, PS, and PE are quantified as a mol percentage of total phospholipids. The data  
1386 represent the mean ± S.D. derived from the analysis of four to five independent samples. “n.s.,”  
1387 indicates no significant difference between all combinations as determined by the

1388 Tukey–Kramer test.

1389

1390 **S4 Fig. Nutrient transporters fail to localize to the PM in the triple but not in the double**  
1391 **mutants.**

1392 (A) Can1-GFP (upper panel) and Hip1-GFP (lower panel) were localized to the PM in the

1393 *lem3Δ sfk1-2*, *crf1Δ sfk1-2*, and *crf1Δ lem3Δ* double mutants. Cells were cultured as in Fig

1394 2C. (B) Nutrient transporters failed to localize to the PM in the *crf1Δ lem3Δ sfk1-2* triple

1395 mutant. Amino acid transporters (Alp1-, Lyp1-, Tat1-, and Ptr2-GFP) and glucose

1396 transporters (Hxt2-, 3-, and 4-GFP) were examined. Cells were cultured as in Fig 2C. (C)

1397 Can1-GFP and Hip1-GFP were mislocalized to the vacuole by endocytosis in the *crf1Δ*

1398 *lem3Δ sfk1-2* triple mutant. Cells were cultured in YPDA at 37°C for 5.5 h, followed by

1399 additional incubation for 30 min in the presence (LAT-A) or absence (DMSO) of 100 μM

1400 LAT-A. *Right panel:* the percentage of cells with Can1-GFP or Hip1-GFP at the PM was

1401 determined and is expressed as the mean ± S.D. of three independent experiments (n>168

1402 cells in total for each strain). Asterisks indicate a significant difference, as determined by the

1403 Tukey–Kramer test (p < 0.05). Bars, 5 μm.

1404

1405 **S5 Fig. The defects in the *crf1Δ lem3Δ sfk1-2* mutant may be independent of PI(4)P.**

1406 (A) The distribution of the Osh2-PH-GFP PI(4)P biosensor was not altered in the *crf1Δ*

1407 *lem3Δ sfk1-2* triple mutant. Cells were cultured as in Fig 2C. Bar, 5 μm. *Right panel:* The  
1408 localization of Osh2-PH-GFP was categorized into four patterns. The percentages of cells  
1409 with these patterns were determined and expressed as the mean ± S.D. of three independent  
1410 experiments (n > 142 cells in total for each strain). “n.s.,” indicates no significant difference  
1411 between all combinations as determined by the Tukey–Kramer test. (B) The C-terminal  
1412 truncation of *SFK1* did not affect the growth of the *crf1Δ lem3Δ* double mutant. The  
1413 *SFK1ΔC-GFP* mutant in which the C-terminal cytoplasmic region was deleted [39] was  
1414 combined with *crf1Δ lem3Δ* mutations. Tenfold serial dilutions were spotted onto a YPDA  
1415 plate, followed by incubation for 1.5 d at 30 or 37°C.

1416

1417 **S6 Fig. Normal localizations of Kes1-GFP and GFP-ER in the *lem3Δ sfk1-2*, *crf1Δ sfk1-2*,**  
1418 **and *crf1Δ lem3Δ* double mutants.**

1419 The localizations of Kes1-GFP (A) and GFP-ER (B) in the double mutants are shown. Cells  
1420 were cultured as in Fig 2C. Bars, 5 μm.

1421

1422 **S7 Fig. Filipin staining in the *lem3Δ sfk1Δ*, *crf1Δ sfk1Δ*, and *crf1Δ lem3Δ* double**  
1423 **mutants.**

1424 Cells were cultured and stained with filipin as in Fig 5A. Bar, 5 μm.

1425

1426 **S8 Fig. Ergosterol-dependent PM localization of GFPenvy-D4H.**

1427 (A) Fluconazole treatment inhibits the GFPenvy-D4H distribution to the PM. Wild-type cells  
1428 harboring pRS316-GFPenvy-D4H were grown in SDA-Ura medium to the mid-log phase at  
1429 30°C and then treated with 100 µM fluconazole or mock treated, followed by incubation for 6  
1430 h at 30°C. *Right panel*: the percentage of cells with GFPenvy-D4H at the PM was determined  
1431 and is expressed as the mean ± S.D. of three independent experiments (n > 257 cells in total  
1432 for each condition). An asterisk indicates a significant difference, as determined by the  
1433 Tukey–Kramer test (p < 0.05). (B) The distribution of GFPenvy-D4H in mutants of genes  
1434 encoding the enzymes in the late steps of ergosterol biosynthesis (*ERG2-6*). Cells were  
1435 cultured in SDA-Ura medium at 30°C to the mid-log phase. (C) GFPenvy-D4H was localized  
1436 to the PM in the *lem3Δ sfk1-2*, *crf1Δ sfk1-2*, and *crf1Δ lem3Δ* double mutants. Cells were  
1437 cultured as in Fig 2C, except that SDA-Ura medium was used. (D) The PM localization of  
1438 GFPenvy-D4H was partially recovered by *KES1* overexpression in the *crf1Δ lem3Δ sfk1-2*  
1439 triple mutant. Cells harboring pRS316-GFPenvy-D4H and either YEplac181-*KES1* or  
1440 YEplac181 were cultured as in Fig 2C except that SD-Leu-Ura medium was used. Arrows  
1441 indicate the PM localization of GFPenvy-D4H. *Right panel*: the percentage of cells with  
1442 GFPenvy-D4H at the PM was determined and is expressed as the mean ± S.D. of three  
1443 independent experiments (n > 121 in total for each strain). An asterisk indicates a significant  
1444 difference, as determined by the Tukey–Kramer test (p < 0.05). Bars, 5 µm.

1445

1446 **S9 Fig. TF-Chol is retained in the PM of the *lem3Δ sfk1-2*, *crf1Δ sfk1-2*, and *crf1Δ lem3Δ***  
1447 **double mutants.**

1448 Cells were cultured and labeled with TF-Chol as described in the “Materials and Methods”.

1449 Bar, 5 μm.

1450

1451 **S10 Fig. Identification of esterified ergosterol.**

1452 TLC analysis of total sterols was performed as in Fig 7A. To detect esterified ergosterol, total  
1453 lipids were extracted from cells in the stationary phase.

1454

1455 **S11 Fig. Lipid droplets are increased in the *crf1Δ lem3Δ sfk1-2* triple mutant.**

1456 (A) Nile red staining in the *lem3Δ sfk1Δ*, *crf1Δ sfk1Δ*, and *crf1Δ lem3Δ* double mutants. Cells  
1457 were cultured in YPDA medium to the mid-log phase at 30°C, followed by Nile red staining.

1458 Nile red staining was performed as described in the “Materials and Methods”. (B)

1459 Accumulation of Tgl1-GFP (left) and Faa4-GFP (right) puncta in the *crf1Δ lem3Δ sfk1-2*

1460 triple mutant. Cells were cultured as in Fig 2C. All images were acquired and processed

1461 under the same conditions for comparison of fluorescence intensity. Bars, 5 μm.

1462

1463 **S12 Fig. The growth defect in the *crf1Δ lem3Δ sfk1-2* triple mutant is independent of**

1464 **triacylglycerol.**

1465 (A) The growth defect of the *crf1Δ lem3Δ sfk1-2* triple mutant is not suppressed by either the  
1466 *dgalΔ* or *lro1Δ* mutation. Tenfold serial dilutions were spotted onto a YPDA plate, followed  
1467 by incubation for 1.5 d at 30 or 37°C. (B) Synthetic growth defects in the *are2Δ upc2-1*  
1468 mutant. Diploid cells with the indicated genotype were sporulated, dissected, and grown at  
1469 30°C for 4 d. Tetrad genotypes were determined as in Fig 1B, and the identities of the double  
1470 mutant segregants are shown in parentheses (red circles).

1471

1472 **S13 Fig. Classification of Sfk1-mCherry-expressing cells with low or high expression**

1473 **patterns.**

1474 (A) Fluorescence intensity profile of a cell showing the “partially polarized” pattern of  
1475 GFPenvy-D4H. Fluorescence signals were quantified along the dotted line from the mother  
1476 cell to the bud. The brightness of Sfk1-3xmCherry was adjusted as in Fig 9B. Bar, 3 μm. (B)  
1477 Classification of Sfk1-mCherry-expressing cells with low or high expression patterns. The  
1478 cells in Fig 9E were examined. Low or high expression of Sfk1-mCherry was determined for  
1479 each cell on the basis of our threshold value, which was set at 300% of the fluorescence  
1480 intensity of endogenously expressed Sfk1-3xmCherry. Fluorescence intensity at the PM was  
1481 quantitated as described in the “Materials and Methods”. The ratio of the fluorescence at the  
1482 PM ( $F_{pm}$ )/that of whole cell ( $F_{whole\ cell}$ ) was determined and expressed with a boxplot



1483 (whiskers: maximum and minimum values; box: first quartile, median, and third quartile;  
1484 circle: average). *Bars*: Endo, endogenous expression of Sfk1-3xmCherry; Low, multicopy  
1485 plasmid of *SFK1-mCherry* but low expression of Sfk1-mCherry; High, multicopy plasmid of  
1486 *SFK1-mCherry* and high expression of Sfk1-mCherry. The numbers of cells analyzed were  
1487 13, 34, and 22 for Endo, Low, and High, respectively. An asterisk indicates a significant  
1488 difference, as determined by the Tukey–Kramer test ( $p < 0.05$ ).

1489

1490 **S1 Raw Images. Raw images underlying figures.**

1491 From Figs. 5C, 5D and 7A and S10 Fig.

1492

1493 **S1 Table. *Saccharomyces cerevisiae* strains used in this study.**

1494

1495 **S2 Table. Plasmids used in this study.**

1496

1497 **S3 Table. Excel spreadsheet containing the numerical data and statistical analysis for**

1498 **Figs 2E, 2F, 3A, 3C, 3D, 4B, 4C, 4E, 5A, 5B, 5C, 5D, 5E, 5F, 6B, 7A, 7B, 7C, 8B, 9C, 9D,**

1499 **9F, and 9G, S1, S3, S4C, S5A, S8A, S8D, S13A and S13B Figs.**

1500

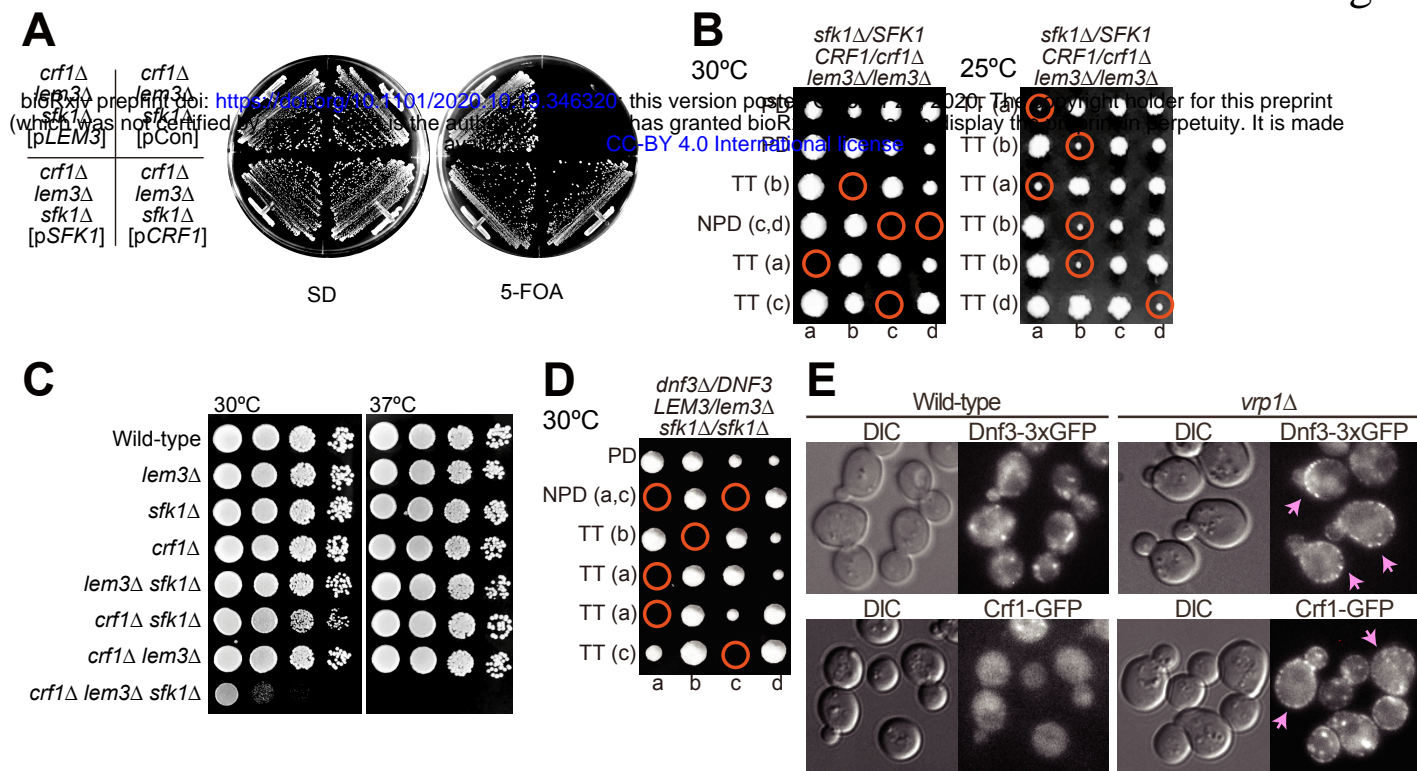

bioRxiv preprint doi: <https://doi.org/10.1101/2020.10.13.346320>; this version posted October 20, 2020. The copyright holder for this preprint (which was not certified by peer review) is the author/funder, who has granted bioRxiv a license to display the preprint in perpetuity. It is made available under aCC-BY 4.0 International license.

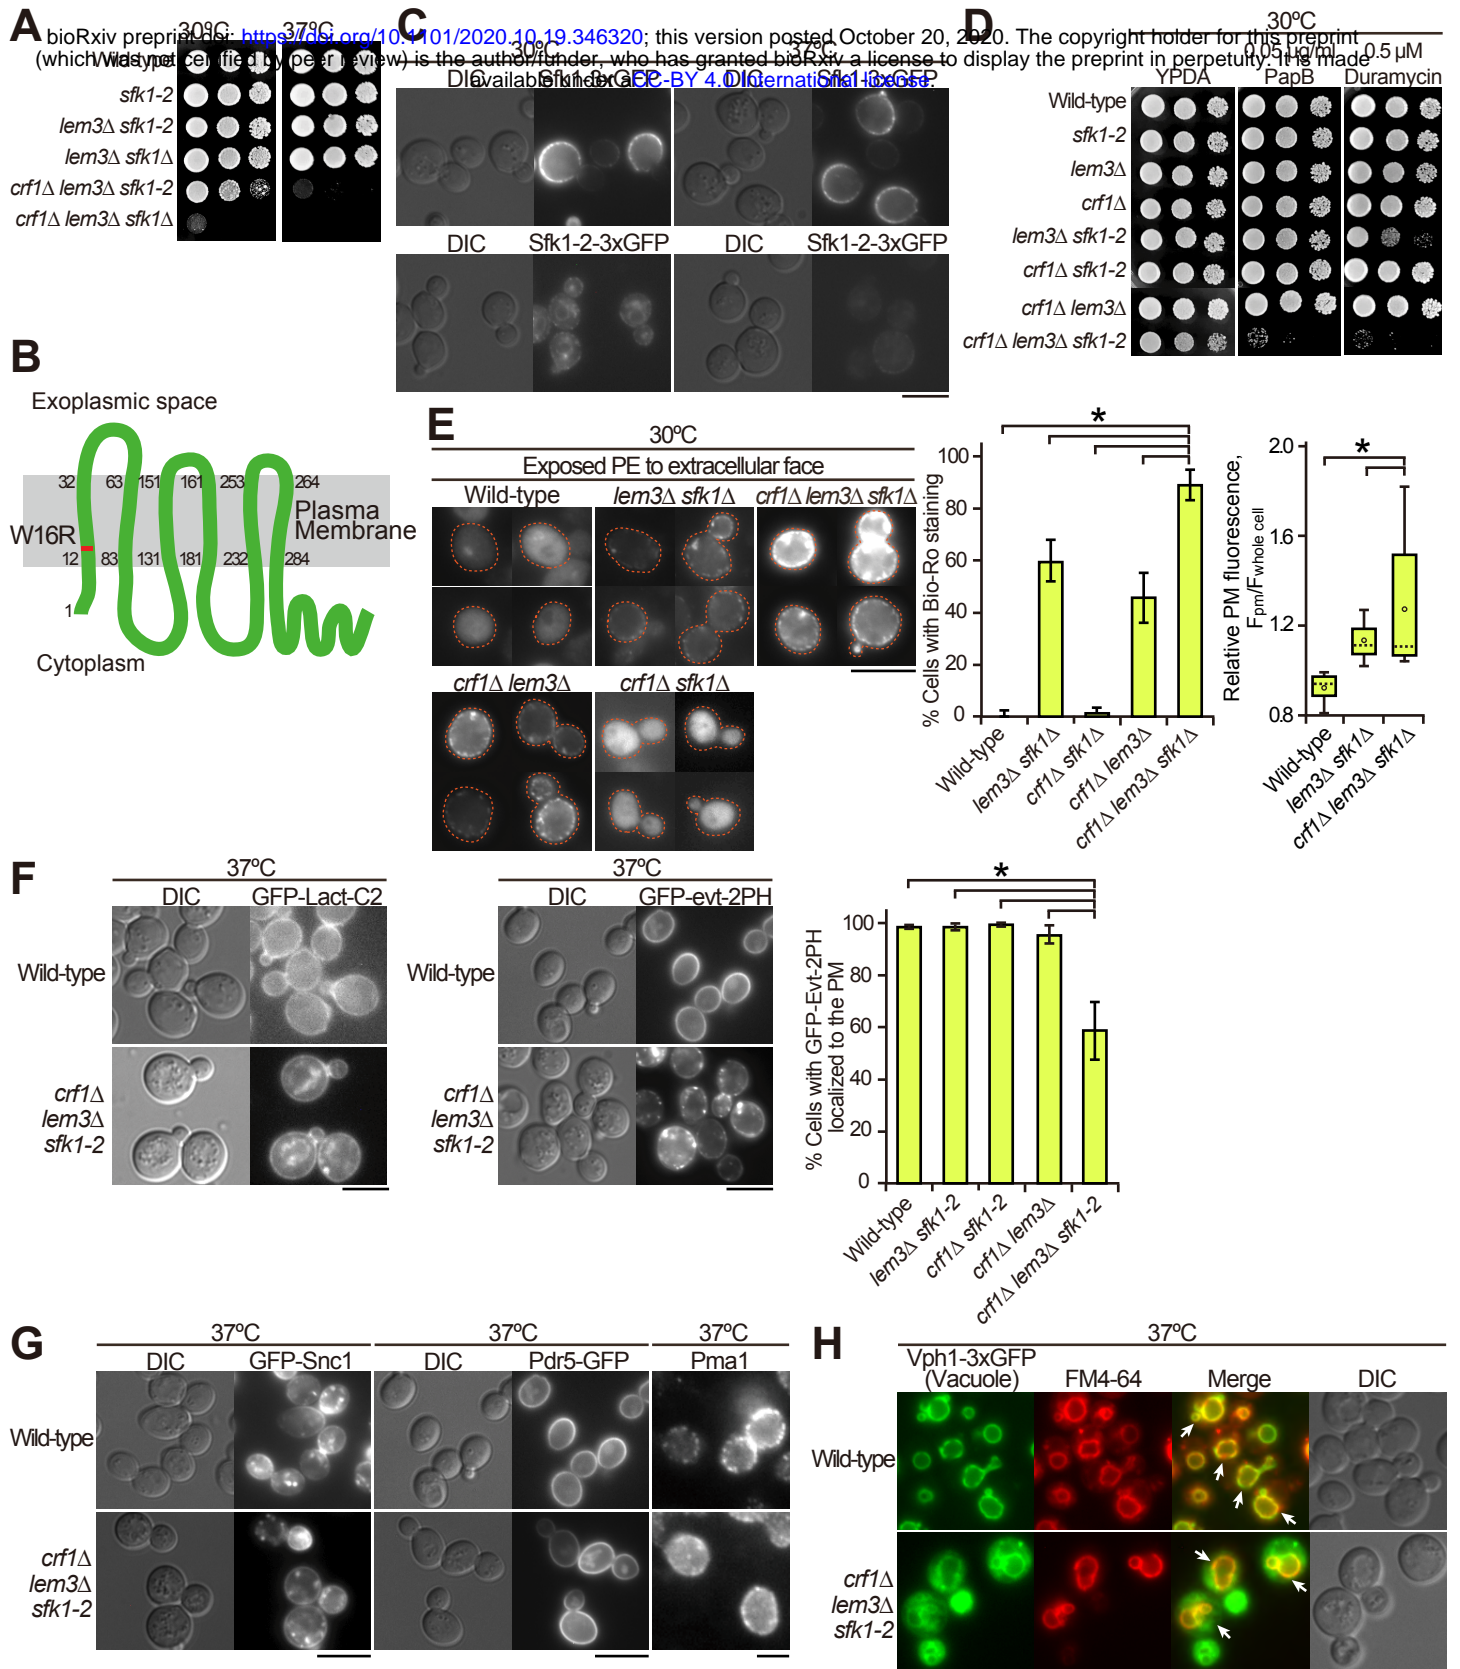

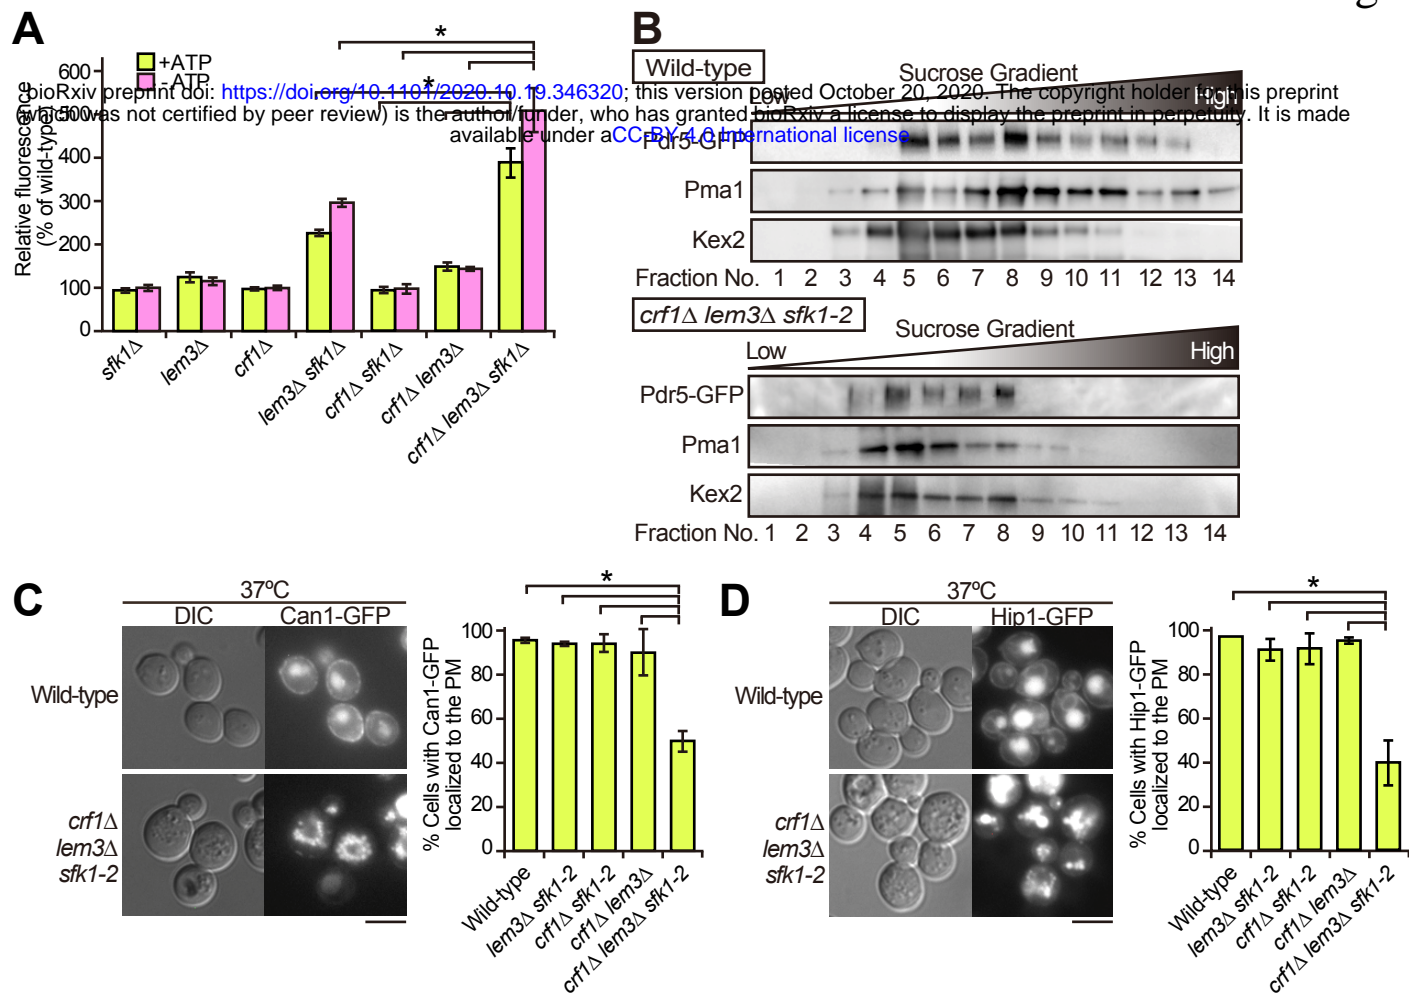

**Fig 4**

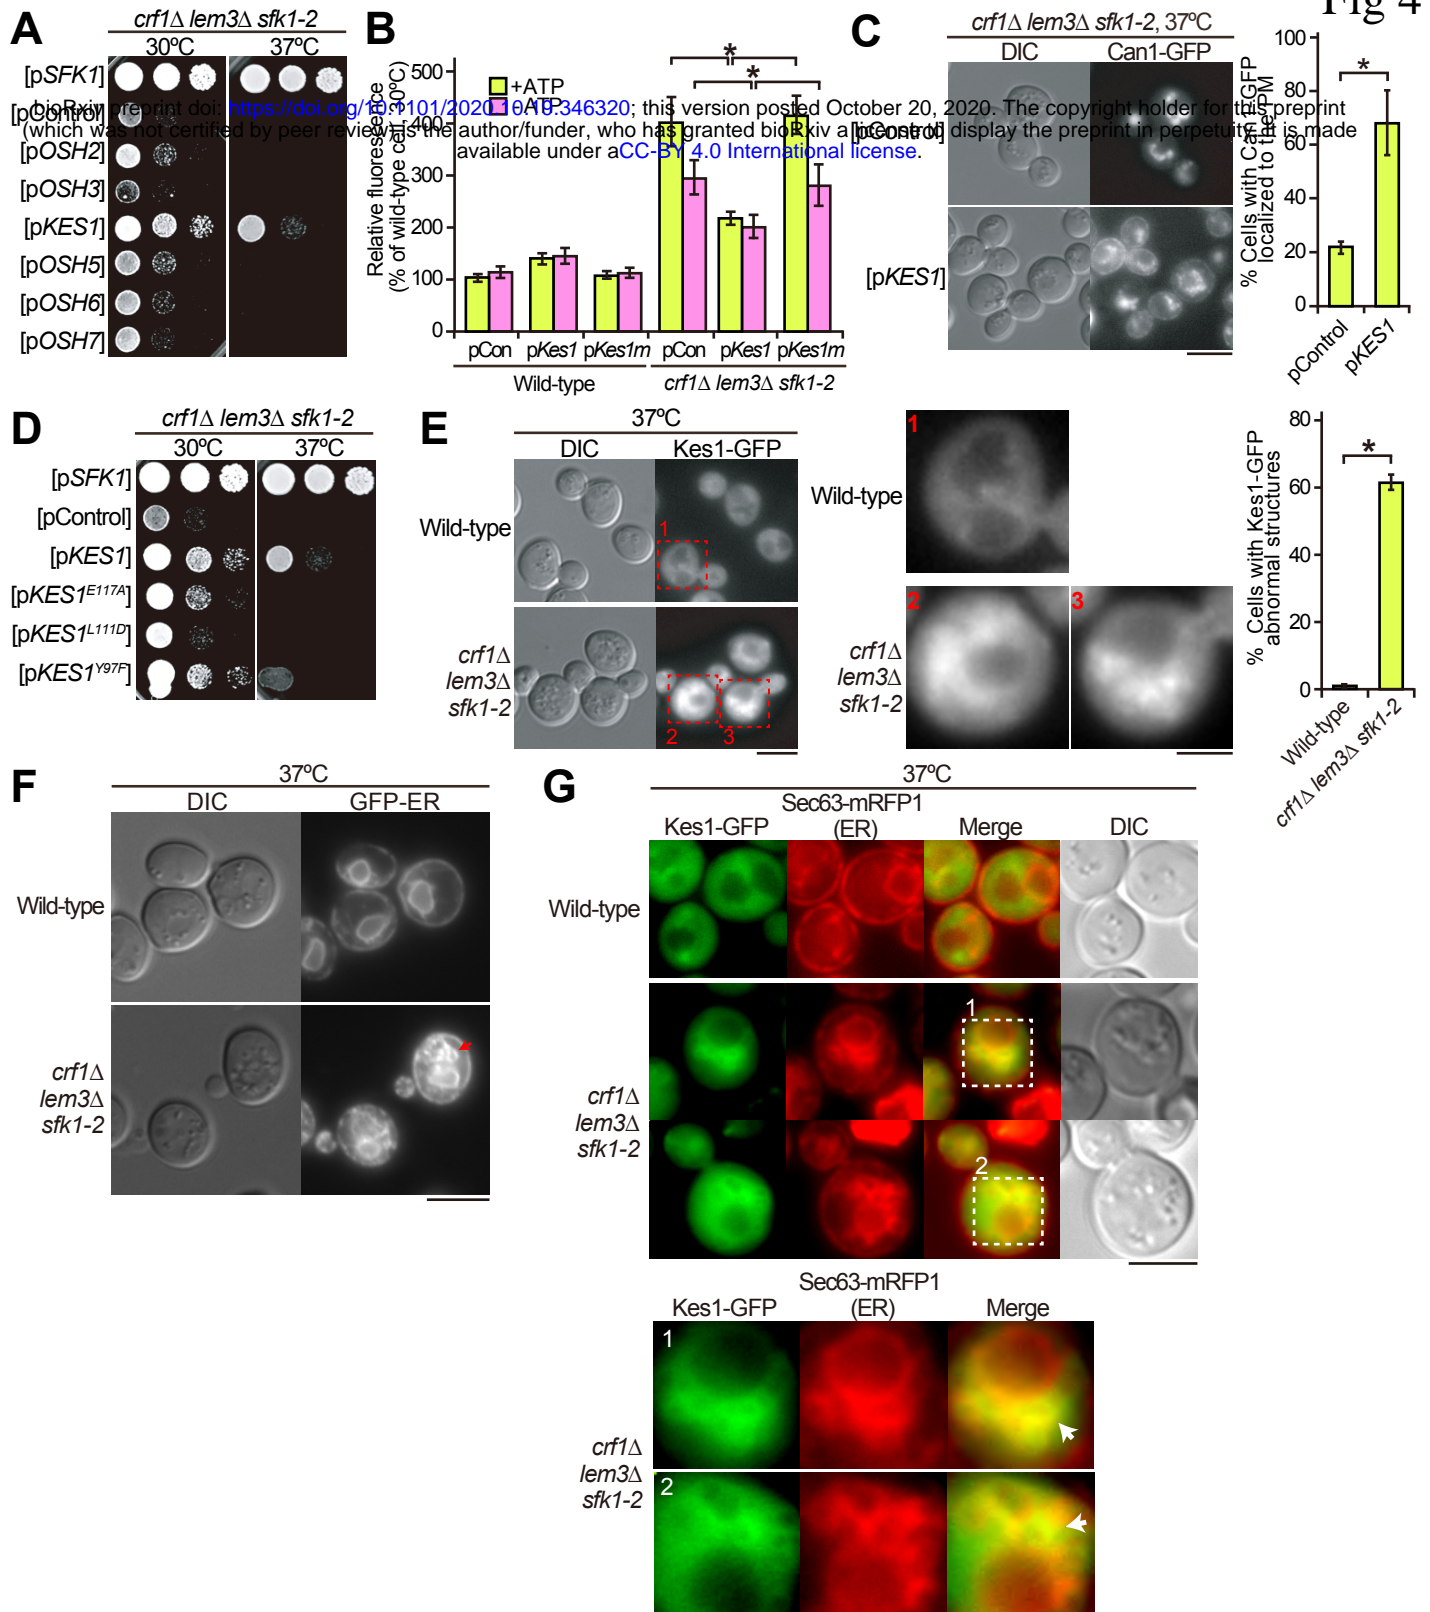

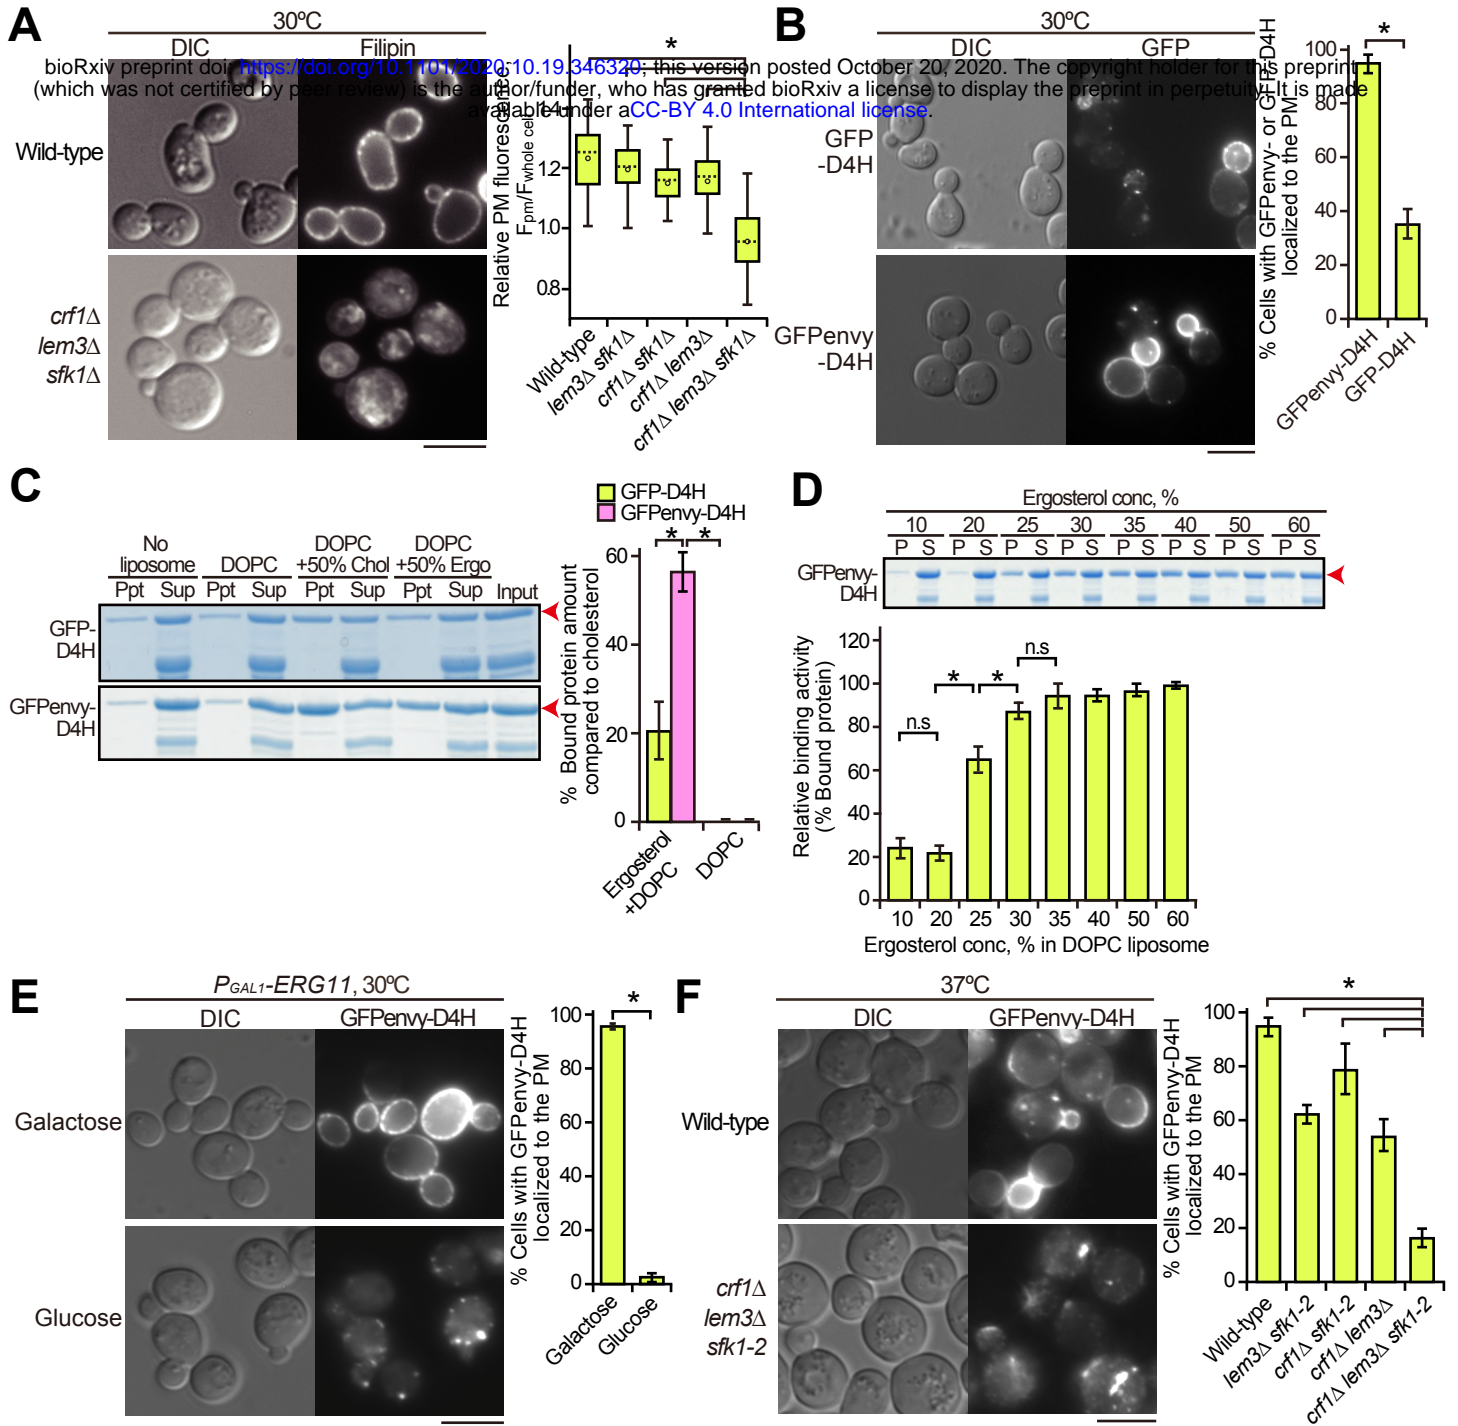

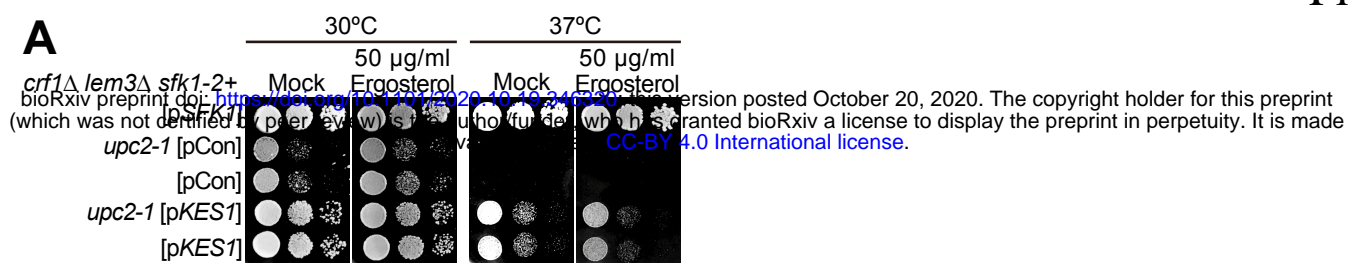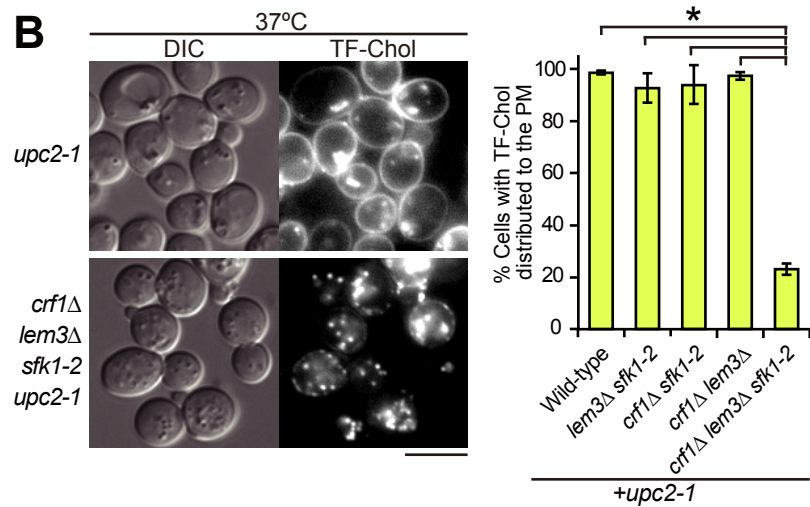

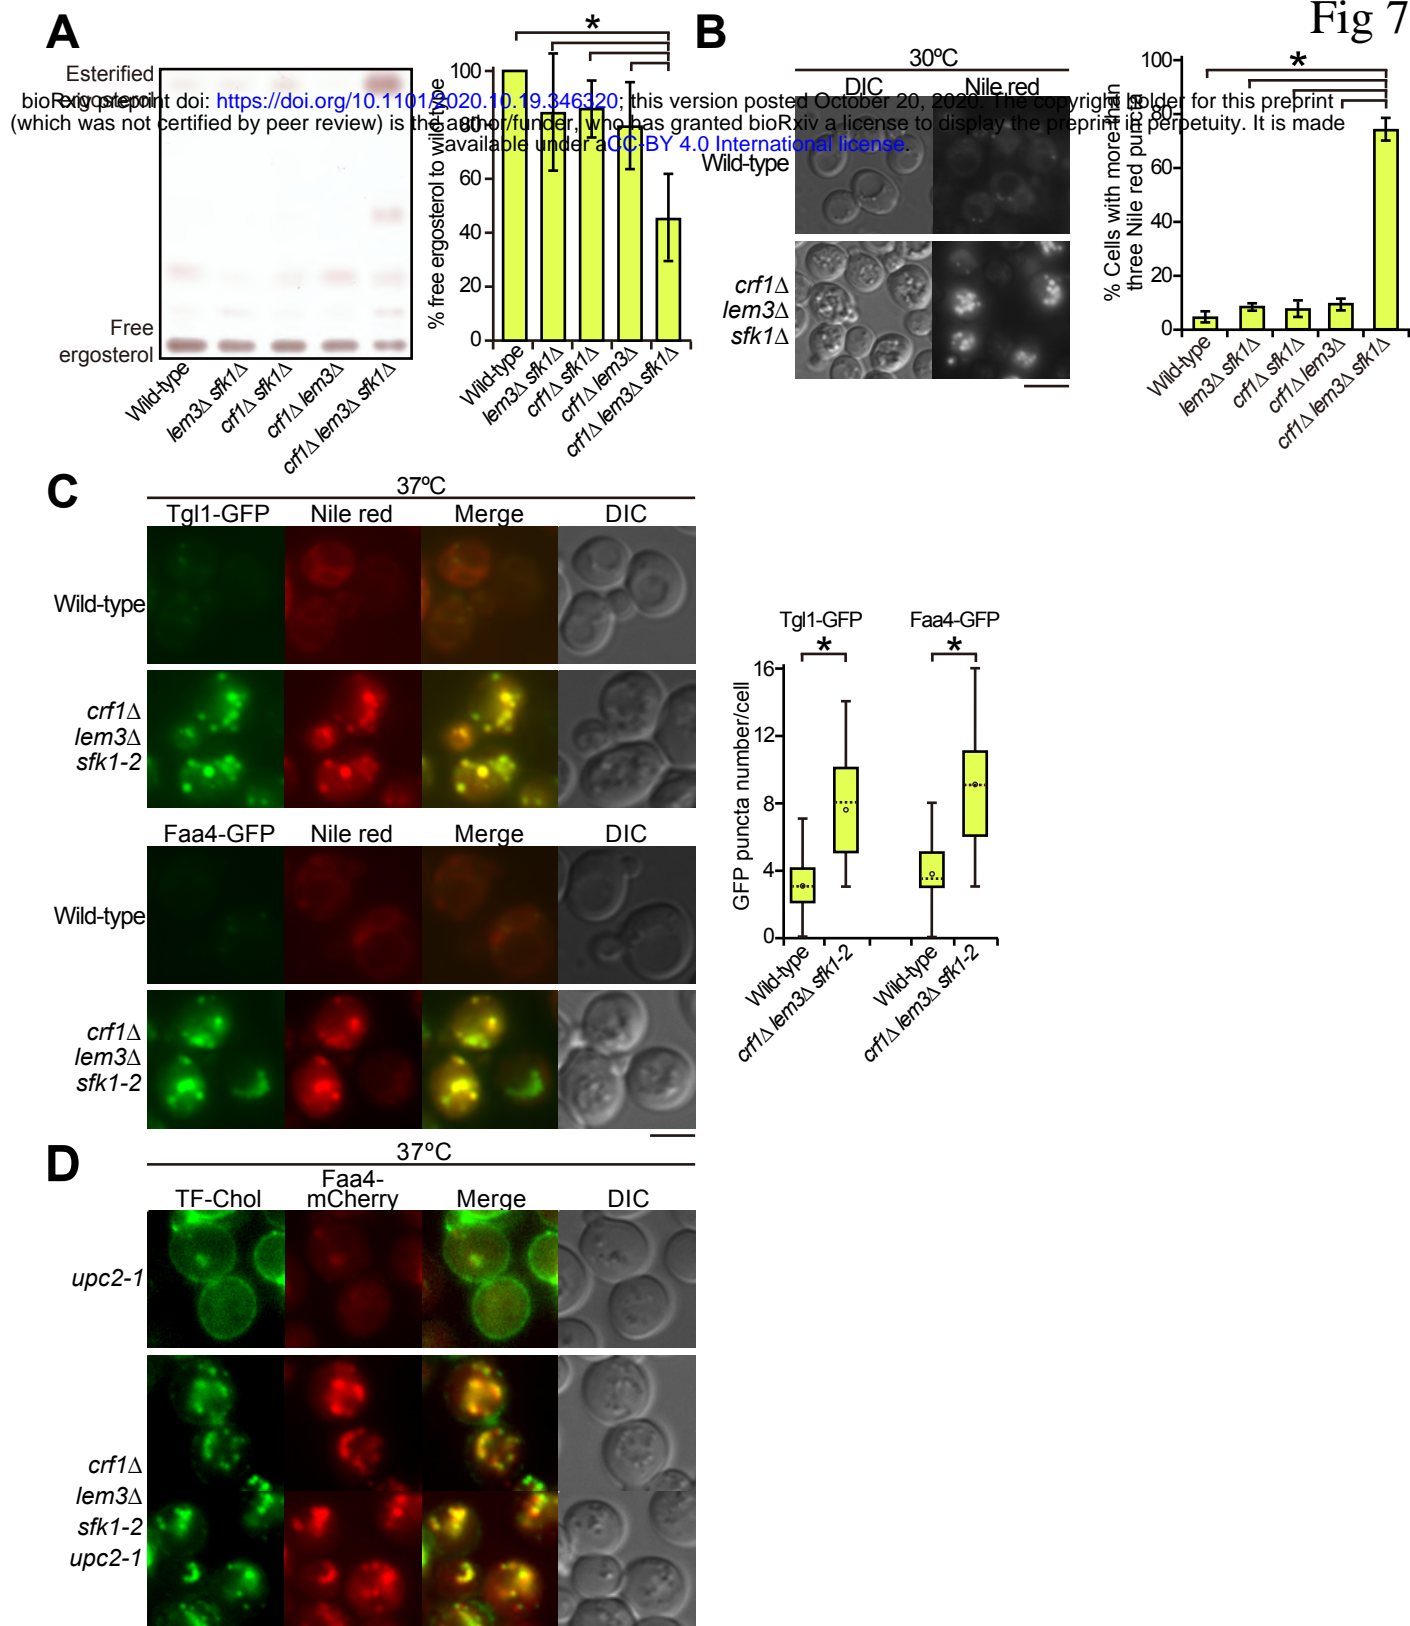

bioRxiv preprint doi: <https://doi.org/10.1101/2020.10.19.346320>; this version posted October 20, 2020. The copyright holder for this preprint (which was not certified by peer review) is the author/funder, who has granted bioRxiv a license to display the preprint in perpetuity. It is made available under aCC-BY 4.0 International license.



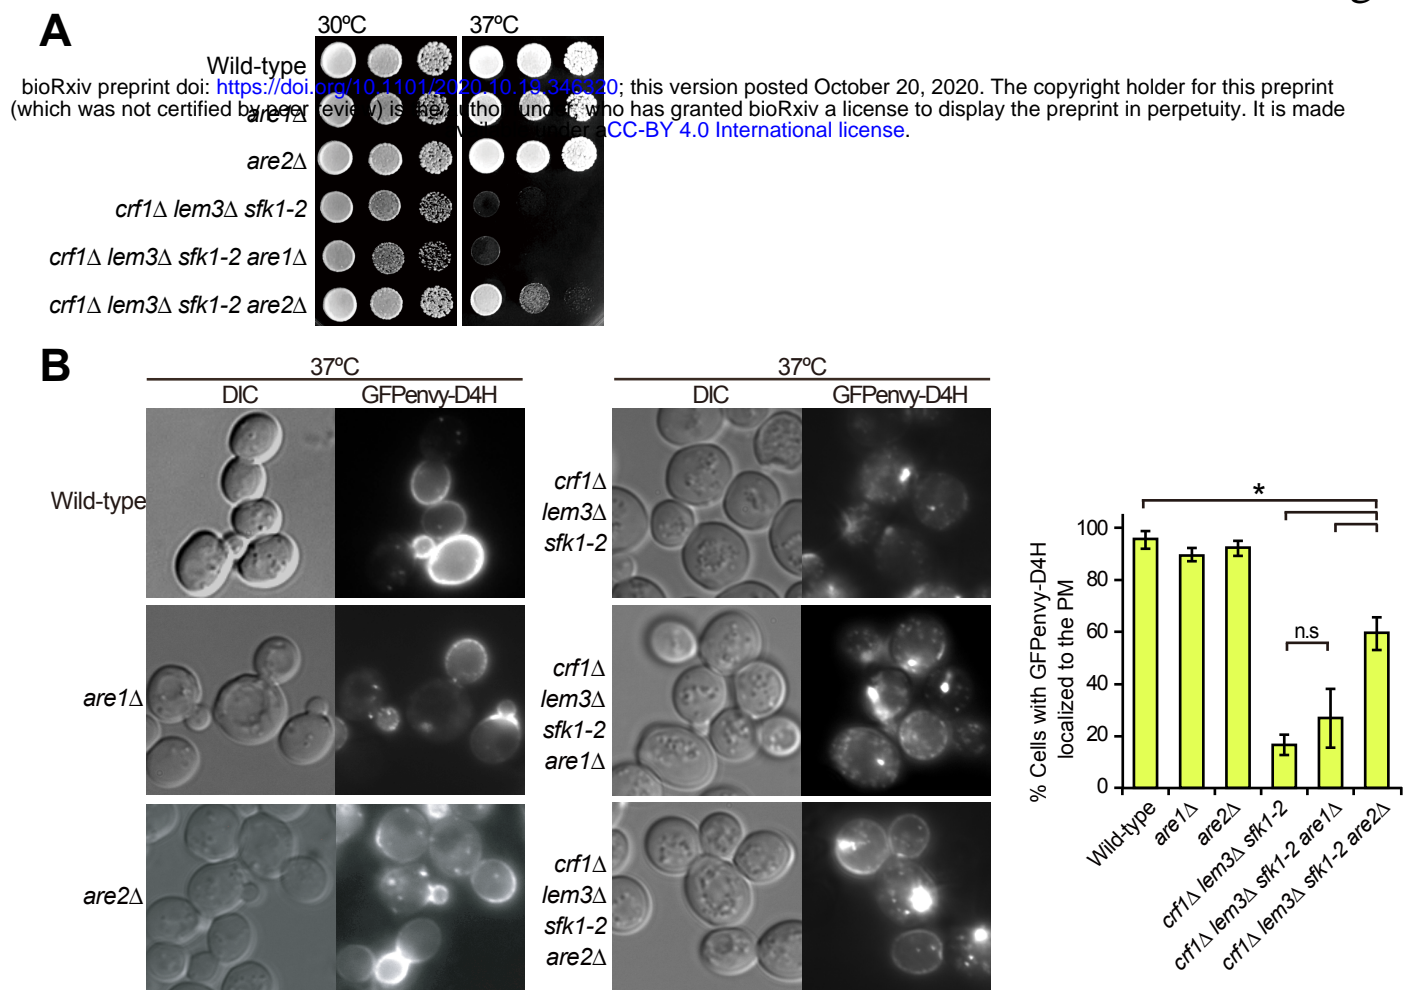

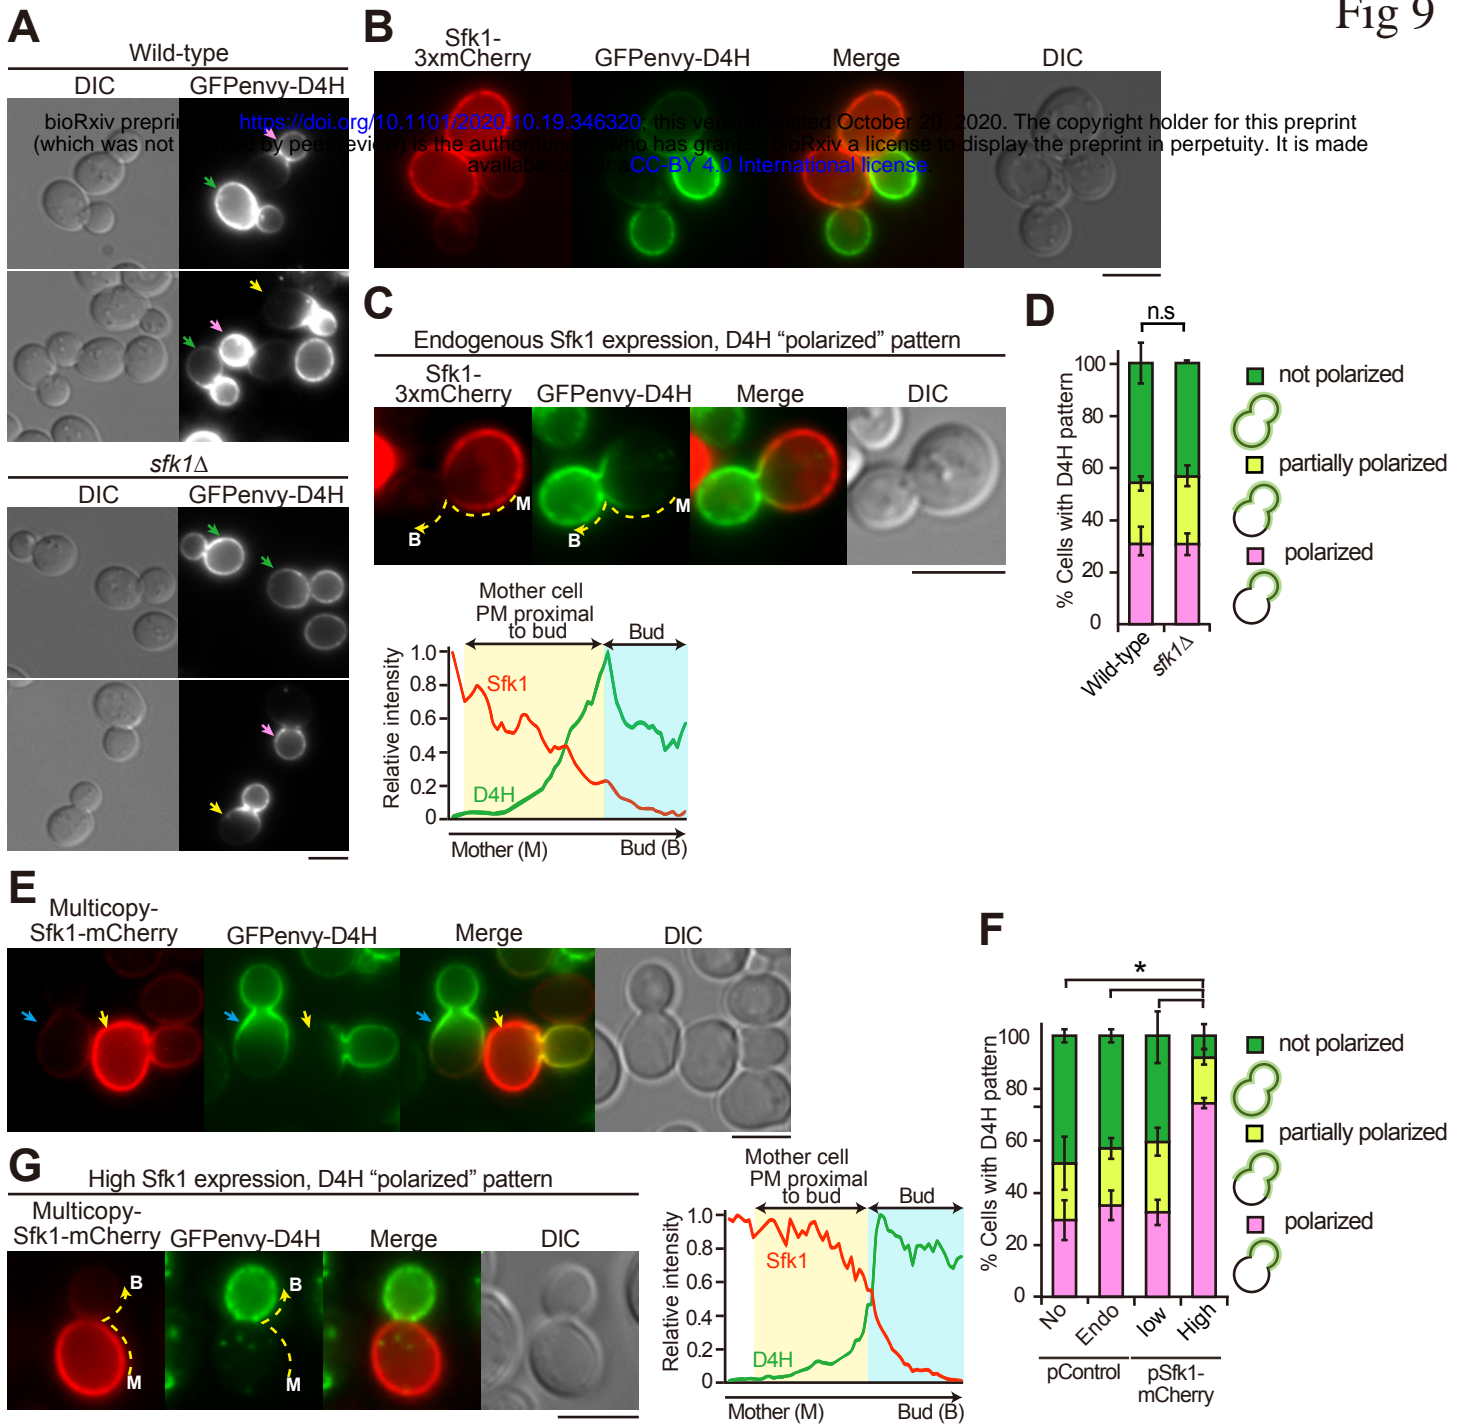

Source: https://www.biorxiv.org/content/10.1101/2020.10.19.346320v1.full.pdf
